# Quantitative Multi-pathway Assessment of Exposure to Fecal Contamination for Infants in Rural Ethiopia

Yuke Wang<sup>1,\*</sup>, Yang Yang<sup>2</sup>, Crystal M. Slanzi<sup>3</sup>, Xiaolong Li<sup>4,5</sup>, Amanda Ojeda<sup>6</sup>,  
Fevi Paro<sup>4</sup>, Loïc Deblais<sup>7,8</sup>, Habib Yakubu<sup>1</sup>, Bahar Mummed Hassen<sup>9</sup>, Halengo Game<sup>10</sup>,  
Kedir Teji Roba<sup>10,11</sup>, Elizabeth Schieber<sup>12</sup>, Abdulmuen Mohammed Ibrahim<sup>10</sup>,  
Jeylan Wolyie<sup>13</sup>, Jemal Yusuf Hassen<sup>10</sup>, Gireesh Rajashekara<sup>7,8,14</sup>, Sarah L. McKune<sup>4</sup>,  
Arie H. Havelaar<sup>4</sup>, Christine L. Moe<sup>1</sup>, and Song Liang<sup>15</sup>

## Declaration of Competing Interest

The authors declare that they have no conflicts of interest.

<sup>1</sup>Hubert Department of Global Health, Rollins School of Public Health, Emory University, Atlanta, GA 30322, USA

<sup>2</sup>Department of Statistics, Franklin College of Arts and Sciences, University of Georgia, Athens, GA 30602, USA

<sup>3</sup>Department of Social and Behavioral Sciences, College of Public Health, Temple University, Philadelphia, PA 19122 USA

<sup>4</sup>Emerging Pathogens Institute, University of Florida, Gainesville, FL 32610, USA

<sup>5</sup>Department of Environmental and Global Health, College of Public Health and Health Professions, University of Florida, Gainesville, FL 32610, USA

<sup>6</sup>Department of Microbiology and Cell Science, University of Florida, Gainesville, FL 32611, USA

<sup>7</sup>Department of Animal Sciences, CFAES Wooster, The Ohio State University, Wooster, OH 44691, USA

<sup>8</sup>Global One Health initiative, The Ohio State University, Addis Ababa, Ethiopia

<sup>9</sup>College of Veterinary Medicine, Haramaya University, Dire Dawa, Ethiopia

<sup>10</sup>College of Health and Medical Sciences, Haramaya University, Dire Dawa, Ethiopia

<sup>11</sup>Department of Biobehavioral Health, Pennsylvania State University, University Park, PA 16802, USA

<sup>12</sup>dfusion Inc., Scotts Valley, CA 95066, USA

<sup>13</sup>College of Social Sciences and Humanities, Haramaya University, Dire Dawa, Ethiopia

<sup>14</sup>Department of Pathobiology, College of Veterinary Medicine, University of Illinois at Urbana-Champaign, Urbana, IL 61802, USA

<sup>15</sup>Department of Environmental Health Sciences, School of Public Health and Health Sciences, University of Massachusetts, Amherst, MA 01003, USA

\*Address correspondence to Yuke Wang, Hubert Department of Global Health, Rollins School of Public Health, Emory University, 1518 Clifton Rd NE, CNR6040B, Atlanta, GA 30322. E-mail: yuke.wang@emory.edu

## 6 Abstract

7 In low- and middle-income countries (LMICs), enteric infections pose a significant threat to chil-  
 8 dren's health. However, understanding the specifics of when, where, and how young children in  
 9 LMICs are exposed to enteric pathogens and the roles of animal reservoirs, environmental me-  
 10 dia, and human hosts play during exposure remains limited. This study systematically evaluates  
 11 infants' exposure to *E. coli* through various pathways in the rural Haramaya woreda of Ethiopia.  
 12 Between June 2021 and June 2022, we conducted over 1300 hours of structured behavioral ob-  
 13 servations on 79 infants when aged 4–8 months (Timepoint 1) and 11–15 months (Timepoint  
 14 2). Enumerators recorded the infant's behavior related to exposure, including when and where  
 15 it occurred, using the Countee © application. Concurrently, we collected 1338 environmental  
 16 samples from key contact interfaces between infants, other people, and the environment to test  
 17 for *E. coli*. We used a competing hazard model for duration-based behaviors, an inhomogeneous  
 18 Poisson point process model for frequency-based behaviors, and a left-censored lognormal dis-  
 19 tribution model for *E. coli* contamination levels. The behavioral and environmental information  
 20 was then integrated into an agent-based exposure model framework to quantify the exposure to  
 21 *E. coli* through different pathways.

22 The infant behavior, which altered the relative importance of different exposure pathways, changed  
 23 as children grew older. Notably, we observed increased rates of touching behavior (e.g., touch-  
 24 ing fomites) and soil-pica, increased consumption of solid food, and more time spent on the bare  
 25 ground at Timepoint 2. The major sources of exposure to *E. coli* were food and breastfeeding at  
 26 Timepoint 1 and food and soil at Timepoint 2. This study provides insights for interventions to  
 27 minimize infants' risk of exposure to fecal contamination and subsequent risk of enteric infec-  
 28 tions, including improved food handling practices, enhanced personal hygiene for breastfeeding  
 29 caregivers, and education on the risk of soil-pica.

30 **Keywords:** exposure assessment, multi-pathway, infant, rural, Ethiopia, *E. coli*

# 1 Introduction

Enteric diseases caused by enteric pathogens pose a substantial disease burden among people living in low- and middle-income countries (LMICs),<sup>[1]</sup> with young children being particularly vulnerable.<sup>[2]</sup> Diarrheal diseases are the fifth leading cause of mortality among children under 5, resulting in over 446,000 global deaths annually, with approximately 90% occurring in South Asia and Sub-Saharan Africa.<sup>[3,4]</sup> Beyond acute diarrhea, enteric infections can lead to various short- and long-term health issues, such as malnutrition,<sup>[5]</sup> physical<sup>[6]</sup> and cognitive<sup>[7]</sup> developmental challenges, and environmental enteric dysfunction,<sup>[8]</sup> among others. Despite the well-recognized risk of these enteric pathogens, how, when, and where children in LMICs are exposed to these enteric pathogens<sup>[9]</sup> and quantitative descriptions of exposure to enteric microbes/pathogens through various pathways remain under-investigated and less understood.

There has been growing attention to young children's exposure to fecal contamination and enteric pathogens in LMICs due to the urgent need to mitigate associated adverse health effects.<sup>[9,10,11]</sup> Two large water, sanitation, and hygiene (WASH) intervention trials in rural African settings (Kenya, Zimbabwe) failed to demonstrate improved health outcomes in children under five years of age, and the investigators concluded that basic WASH interventions were not sufficient to reduce pediatric diarrheal disease and improve linear growth.<sup>[12]</sup> However, these studies did not examine child behavior and only the Kenyan study analyzed the impact of the interventions on limited environmental pathways – *E. coli* on children's hands, stored drinking water, and sentinel objects.<sup>[13]</sup> So it is not clear to what degree the WASH interventions reduced overall child exposure to fecal contamination. The SaniPath study has made a significant contribution to our understanding of exposure assessment in quantitatively assessing exposure to fecal contamination by combining information collected from structured behavioral observations and surveys with results from environmental and human microbiological sampling, primarily in urban settings involving both children and adults.<sup>[14,15,16,17]</sup> Other recent studies examined environmental exposure to enteric pathogens among infants and children under five in Kenya,<sup>[18,19]</sup> Zimbabwe<sup>[20]</sup> and Bangladesh.<sup>[21,22]</sup> These studies have advanced our understanding of the complex pathways through which individuals are exposed to fecal contamination and enteric pathogens and provided insights that inform WASH intervention strategies.

However, there are critical knowledge gaps about infants' exposure to enteric pathogens in rural LMIC settings. Questions about what the primary pathways of exposure are; how infants' behavior, including interactions with other people and the surrounding environment, mediate these pathways; how behavior

changes with age; and how the fecal contamination and enteric pathogens are distributed in the rural environment of LMICs all remain largely unanswered. Given the vulnerability of infants to enteric diseases, closing these knowledge gaps is crucial.

Our study, the Exposure Assessment of *Campylobacter* Infections in Rural Ethiopia (EXCAM), aims to systematically evaluate infants' exposure to *Campylobacter* and fecal contamination in the rural Haramaya woreda, Ethiopia. We use *Escherichia coli* as an indicator organism for fecal contamination and employ a holistic modeling approach that integrates infants' behavior, interactions with other people and with their environment, and environmental contamination levels. The objectives of this paper are: (1) to comprehensively characterize and quantify infants' behavior, including interactions with other people and their surrounding environment, and (2) to quantify exposure to fecal contamination from different sources through various pathways for two age groups of infants in rural Ethiopia.

## 2 Methods

### 2.1 Study Setting and Population

The EXCAM study was nested within the broader *Campylobacter* Genomics and Environmental Enteric Dysfunction (CAGED) study, a longitudinal project that aimed at identifying *Campylobacter* spp. infection reservoirs for infants and evaluating the associated health impacts in the rural Haramaya woreda, Ethiopia.<sup>[23][24][25][26][27]</sup> Building on a Health and Demographic Surveillance Site (HDSS) that covers 12 kebeles in the Haramaya woreda, established by Haramaya University,<sup>[26]</sup> the CAGED study enrolled 115 newborn infants, that were randomly selected from 10 kebeles based on defined inclusion and exclusion criteria.<sup>[26]</sup> Demographics and socio-economic characteristics of the population in the study area were reported by Havelaar et al.<sup>[26]</sup> From this cohort, 79 newborns were randomly selected for the EXCAM study, which had two rounds of cross-sectional data collection: the first round occurred when infants were around 6 months of age (Timepoint 1), and the second round occurred when they were around 12 months of age (Timepoint 2). Among the 79 infants enrolled, three dropped out of the study (one infant deceased, and the other two moved out of the study area) before Timepoint 2.

## 86 **2.2 Data Collection and Sample Testing**

87 The design of our structured behavioral observations drew inspiration from the SaniPath study.<sup>[14,15]</sup> We  
 88 customized the target behaviors and operational definitions for the context of the local rural setting, inte-  
 89 grating insights from the CAGED study<sup>[24,25,26]</sup> and initial pilot field surveys. We adapted an application  
 90 for mobile phones and tablets, “Countee”, to capture high-resolution behavioral data on environmental  
 91 contacts and interactions with other people.<sup>[28,29]</sup> Observations were conducted at two critical stages of  
 92 early childhood development, initially in early infancy and subsequently in late infancy, to reflect evol-  
 93 ing development, mobility, and interactions with surrounding environments. Prior to conducting any  
 94 observations, local enumerators were trained to record behavioral data during observations from both  
 95 videos and live observations. Training continued until enumerators demonstrated competency and were  
 96 able to record data reliably across observations.

97 We collected over 1,300 hours of structured behavioral observation across all infants enrolled. At each  
 98 timepoint, local enumerators conducted up to 10 hours of structured behavioral observations per in-  
 99 fant (5 hours in the morning and 5 hours in the afternoon of the same day). This process yielded  
 100 multi-dimensional time series data, recording the start and end time of duration-based behaviors (awake,  
 101 bathing, drinking, and sleeping) and the timestamp of frequency-based behaviors (eating, mouthing, pica,  
 102 and touching). Data on where the behavior occurred, including location (within homestead and out of  
 103 homestead) and compartments (carried by mother, carried by other, down on a surface with barriers, and  
 104 down on the bare ground) was also collected as duration-based records with start and end time.

105 After each structured observation, the sampling team, on the following day, collected samples from ten  
 106 pre-identified human and environmental sample types (areola swabs of mothers, breast milk, mother  
 107 handrinse, sibling (child) handrinse, infant handrinse, bathing water, drinking water, fomites, food, and  
 108 soil) linked to the interfaces between infants and environment. Sampling locations in each household were  
 109 selected based on information provided by the enumerators who conducted the behavioral observations.

110 A total of 1338 human and environmental samples were collected, and all samples were transported  
 111 in cold boxes containing ice packs to Haramaya University’s laboratory within 6 hours of collection.

112 Subsequently, samples were processed and tested for *E. coli* using two lab methods, depending on the  
 113 nature of the sample.<sup>[30]</sup> EC MUG, a fluorometric approach, was used for clear liquid samples such as

114 handrinse, areola swabs, breast milk, drinking water, bathing water, fomites, and liquid food samples.

115 Chromocult, a plate count method, was employed for breast milk, resuspended solid food that was opaque,

and soil samples. Each sample's *E. coli* concentration level was calculated based on the lab method (Supplementary Table 1). The details of laboratory methods and results can be found in Deblais et al.<sup>30</sup> The number of *E. coli* was quantified as Most Probable Number (MPN) for the EC MUG method and Colony Forming Units (CFU) for the Chromocult method. In this study, we assumed 1 MPN is equivalent to 1 CFU, and CFU was used as the unit for exposure assessment.

## 2.3 Quantifying Infants' Behavior and Fecal Contamination

The duration-based behaviors and frequency-based behaviors were modeled in two steps. Similar to Teunis et al.,<sup>14</sup> a combination of activity, compartment, and location was defined as a *state* for duration-based behaviors. Among 32 possible *states*, only 21 *states* were observed in this study. Those *states* not observed were then omitted from the model. A change of *state* of a child was defined as a *transition*. Then, the sequence of duration-based behaviors can be considered a series of *transitions* between *states*. Such data can be visualized as a directed, weighted network with *states* as nodes and *transitions* as edges. The weight of an edge represents the relative frequency of the corresponding *transition* observed. The competing hazard model in Teunis et al.<sup>14</sup> was adapted to model the sequences of duration-based behaviors by timepoint. From the start of the current *state*, all possible *transitions* with their own hazard functions compete for moving to the subsequent *state*. The rates of *transitions* were estimated using JAGS<sup>31</sup> and then used to generate Monte Carlo samples of sequences of duration-based behaviors in simulation studies.

When examining the occurrence of frequency-based behaviors (e.g., touching mother's hand) on a continuous timeline, we noted that the rate of the occurrences depends on the current *state* of the child (e.g., touching mother's hand is more likely when awake and carried by mother vs. when sleeping on a surface). Therefore, the frequency-based behavior was modeled as an inhomogeneous Poisson point process with the rate,  $\lambda$ , conditional on the current *state*. The expected occurrence rate of frequency-based behavior ( $b$ ) during a certain *state* ( $s$ ),  $\lambda_{b,s}$ , can be estimated as

$$\hat{\lambda}_{b,s} = \frac{N_{b,s}}{T_s},$$

where  $N_{b,s}$  is the total number of occurrences for frequency-based behavior  $b$  during the time period that child is in the *state*  $s$  and  $T_s$  is the cumulative length of the time period that child is in the *state*  $s$ . The inhomogeneous Poisson process of frequency-based behavior can be simulated by scaling (expanding

or contracting) the time during different *states* with the estimated rates of the frequency-based behavior during those *states*. For example, given a frequency-based behavior has a rate of  $\lambda = 3$  during a *state*, the length of time period of this *state* is expanded to three times its original length in the scaled timeline. Then, the *events* (i.e., occurrences of frequency-based behavior) can be simulated using a homogeneous Poisson process with  $\lambda = 1$  at this scaled timeline and projected back to the original timeline (Figure 1). For environmental samples, we conducted two-sample t-tests to compare *E. coli* results (the concentration and proportion of positive samples) between two timepoints and examined the correlations between the log<sub>10</sub> *E. coli* concentration levels of different sample types within the same household. The log<sub>10</sub> *E. coli* concentration levels were modeled as a normal distribution with left-censoring, and samples with concentration levels below the lower limit of detection (LLOD) were considered negative and thus left-censored. Parameters were estimated using the maximum likelihood method for each sample type at each timepoint.

## 2.4 Multi-pathway Exposure Assessment

We adapted the Multi-pathway Agent-based Exposure Assessment model framework from the SaniPath study to track microbes from environmental and social *sources* through various pathways to ingestion by children.<sup>[1632]</sup> In the current study, the environmental *sources* include fomites, soil, areola surface, breast milk, food, and drinking water, and the social *sources* include hands of the mother, other adults, and other children (e.g., siblings). The *sinks* were defined as destinations of microbes, including mouth and bathing water. The model includes two *vehicles*, hands and food, that can carry microbes from *sources* to *sinks*. We created seven modules to track *source*-specific microbe numbers transferred between *sources*, *vehicles*, and *sinks*, within a network structure:

1. **Hand Touching:** attachment and detachment of microbes on hands by touching hands of the mother, other adults, other children, and fomites.
2. **Mouthing:** microbe ingestion from mouthing hands of the mother, other adults, other children (siblings), infant itself, and fomites
3. **Bathing:** bathing water ingestion and microbe detachment from hands.
4. **Pica:** ingestion of soil and hand touching soil.
5. **Eating:** ingestion from eating solid food, possibly accompanied by hand touching of food.

171 6. **Breastfeeding:** breast milk ingestion and mouthing areola.

172 7. **Drinking Water:** ingestion of drinking water.

173 Simulated behavior sequences, including both duration-based behaviors and frequency-based behaviors,  
174 and estimated *E. coli* levels of various environmental compartments were input into the Exposure Model  
175 for each timepoint. Depending on the behavior (duration-based or frequency-based), the corresponding  
176 module calculates the number of microbes on hands and the microbes ingested, both as a vector of *E.*  
177 *coli* numbers from different original *sources* (Figure 2). In this study, we generated microbe transfers  
178 during 10,000 typical child days (14 hours daytime assumed) for each timepoint. All simulations were  
179 run using R version 4.3.2.<sup>33</sup> All codes for performing the data analyses and modeling are available at  
180 <https://github.com/YWAN446/EXCAM>.

## 181 2.5 Ethics Statement

182 This study was approved by the University of Florida Institutional Review Board (IRB201802987),  
183 the Institutional Health Research Ethics Review Committee (IHREC), Haramaya University, Ethiopia  
184 (IHRERC/091/2020), and National Research Ethics Review Committee, Ministry of Science and Higher  
185 Education (MoSHE), Ethiopia (SBA\117\7103\20). Written informed consent was obtained from all  
186 participants of the study in the local language (Afan Oromo).

## 187 3 Results

### 188 3.1 Quantifying Infants' Behavior

189 In this study, the infants' behavior, in terms of their environmental contact (e.g., touching fomites) and  
190 interactions with other people (e.g., touching mother's hands), evolved with age. Table 1 shows the  
191 differences in infants' behavior between two timepoints. The infants at Timepoint 1 spent more time  
192 sleeping during the day compared to those at Timepoint 2. Bathing behavior was infrequent and short  
193 for both timepoints, with 30.4% of infants bathed for an average of 5.8 min at Timepoint 1 and 57.9%  
194 of infants bathed for an average of 2.1 min at Timepoint 2. Rates (the number of times per hour) of  
195 eating, pica, and touching increased substantially while the rate of mouthing decreased from Timepoint 1  
196 to Timepoint 2.



The nature of infant contact with their environment also changed between two timepoints. Infants at Timepoint 1 rarely spent any time on the bare ground, in contrast to Timepoint 2, when infants spent 16.4% of time on the bare ground (e.g., crawling). During 54.7% of the observation period at Timepoint 1, infants were carried either by mothers or other caregivers; this decreased to 33.9% of the observation period at Timepoint 2. Infants in the study rarely went outside the homestead, defined as a cluster of buildings accommodating an extended family and their small livestock (chickens, small ruminants). Supplementary Figures 1 and 2 present the variations in the proportions of time spent engaging in duration-based behaviors and the rates of frequency-based behaviors between individual infants. Table 2 shows the rates of frequency-based behaviors in each subcategory by timepoint. The rate of consuming solid food and drinking water increased while the rate of breastfeeding slightly decreased from Timepoint 1 to Timepoint 2. At Timepoint 2, infants touched environmental fomites more often and showed a greater tendency towards soil-pica than at Timepoint 1. In addition, we examined the patterns in the sequences of behavior. Supplementary Figures 3-6 show the activities and compartments for sequences of duration-based behaviors at two timepoints. It is visually obvious that sleeping occurred uniformly during the day at Timepoint 1, while at Timepoint 2 infants tended to sleep around noon. The two-dimensional behavior sequences were visualized as directed weighted networks with *states* (combinations of activity and compartment) as nodes and *transitions* between *states* as edges (Supplementary Figure 7). The rates of *transitions* were estimated in the competing hazard model. Supplementary Figures 8 and 9 show the marginal and conditional estimated rates of frequency-based behaviors at Timepoint 1 and Timepoint 2, respectively. Mouthing baby's hands and touching caregiver's hands occurred across different *states*. Touching and mouthing fomites commonly occurred when the infants were awake and down on a surface with barriers or down on the bare ground.

## 3.2 Quantifying Fecal Contamination

The percent of *E. coli* positive samples and the mean *E. coli* concentration of positive samples, measured on a log10 scale, by sample type and timepoint are presented in Table 3 adapted from Deblais et al. 30. The percent of *E. coli* positive between the two timepoints was significantly different for breast milk, infant handrinse, and drinking water. The mean log10 *E. coli* concentrations were significantly different between the two timepoints for infant handrinse and fomites. Infant handrinse samples had both more *E. coli* detection and higher *E. coli* concentrations at Timepoint 2 compared to at Timepoint 1. After

226 assigning the LLOD to the *E. coli* concentration for the negative samples, we calculated the correlations  
 227 between *E. coli* contamination levels (in log10 scale) of different sample types within the same study  
 228 household (Supplementary Figure 10). We found that the *E. coli* contamination level of infant handrinse  
 229 was correlated with the *E. coli* contamination levels of mother handrinse, sibling handrinse, areola swabs,  
 230 and fomites. The *E. coli* contamination level of mother handrinse was correlated with the *E. coli* con-  
 231 tamination levels of infant handrinse, sibling handrinse, drinking water, areola swabs, and fomite. More  
 232 detailed correlation analysis results can be found in Deblais et al.<sup>30</sup> Supplementary Table 2 shows the  
 233 estimated parameters of normal distribution for *E. coli* concentration (in log10 scale) which were used in  
 234 the exposure assessment.

### 235 3.3 Exposure to Fecal Contamination

236 Figure 3 shows the average relative contributions of different social and environmental *sources* to the *in-*  
 237 *gestion* of fecal contamination (measured as *E. coli*) across 10,000 simulations at the two timepoints, and  
 238 Supplementary Figure 11 shows variation in exposure by *sources* and timepoint. Food and breastfeeding  
 239 were the major contributors, “dominant pathways”,<sup>16</sup> to the exposure to fecal contamination for infants  
 240 at Timepoint 1, and as the infants grew older, food and soil were the major contributors at Timepoint 2.  
 241 The average exposure per day, indicated by the color in Figure 3, was higher at Timepoint 2 compared  
 242 to at Timepoint 1. Figure 4 shows the “fecal microbe transfer networks”<sup>16</sup> for infants. Direct pathways  
 243 such as eating, breastfeeding, soil-pica, and mouthing fomites resulted in higher exposure to fecal con-  
 244 tamination. In contrast, hand contact with environmental compartments (i.e., touching fomites or soil)  
 245 and interactions with other people (i.e., touching the hands of the mother, other adults, and other children)  
 246 did not substantially increase the fecal contamination on infants’ hands (even decreased it at Timepoint  
 247 2). The environment-hand-mouth pathways were responsible for a relatively small proportion of the total  
 248 exposure to fecal contamination.

## 249 4 Discussion

250 This study represents a significant component of our broader efforts to systematically assess the exposure  
 251 to fecal contamination, as measured by *E. coli*, and ultimately to important enteric pathogens, such as  
 252 *Campylobacter* for infants in rural regions of Ethiopia. Our primary aim is to gain insights into how chil-

dren's behavior, including interactions with other people and their surrounding environment, modulates their exposure to fecal contamination using *E. coli* as the fecal indicator. This study is notable for being the first to collect and analyze extensive, high-resolution, multi-dimensional behavior sequence data for exposure assessment in rural settings in LMICs. Along with environmental and human microbiological samples as input, a well-calibrated agent-based exposure model can perform a comprehensive assessment to investigate infants' exposure to fecal contamination and enteric pathogens through multiple pathways. Overall, though less frequently consumed, solid food is the most dominant pathway that contributes the highest exposure to fecal contamination, which is similar to our findings for children 5–12 years old and adults in many countries around the globe.<sup>17</sup> Several key findings of our study include:

1. Changes in infant behavior as they grow alter the relative contributions of various environmental exposure pathways.
2. Infants could ingest fecal contamination on mothers' hands, nipples, and areola areas through breastfeeding.
3. Contaminated soil is an important environmental *source* of fecal exposure through infants' hand-mouthing and soil-pica behavior.

The infants' behavior, including interactions with other people and the surrounding environment, evolves rapidly as they grow. For the first few months after birth, infants' behavior is predominantly, if not purely, driven by their biological needs, such as eating, drinking, sleeping, defecating, and seeking comfort. Breastfeeding (due to breast milk being the primary food source) and sleeping occur frequently during the day without a schedule. Their movements around the environment are generally restricted (within the private domain, such as households) and passive (carried by caregivers), while their interactions with caregivers (and siblings) are frequent and close. During this stage of life, poor hygiene behavior of caregivers (e.g., lack of handwashing) and a lack of cleanliness within the household (e.g., dirty toys for mouthing, household surfaces, and food preparation surfaces), due to limited water supply and unimproved sanitation, could have a significant impact on the risk of exposure to fecal contamination and enteric pathogens. During late infancy, they develop basic mobility (i.e., crawling or walking), leading to more active and frequent interaction with the environment both in private (i.e., within homestead) and public domains (i.e., out of homestead). In our study, the infants' hands were observed to be significantly dirtier at Timepoint 2 compared to Timepoint 1. We observed a 120-times increase in the average rate of

soil-pica, a high-risk behavior, at Timepoint 2. In addition, the infants observed started consuming more solid food to supplement the breast milk and the wider range of food that they ingest increases the risk of exposure to contaminated food. These changes in infant behavior alter their exposure profile, which is the relative importance of different environmental pathways contributing to exposure to fecal contamination and enteric pathogens. Information on the dominant environmental exposure pathways is critical for targeting sanitation and hygiene interventions and evaluating their effectiveness. For example, the soil pathway was not a major risk for infants in rural Ethiopia at Timepoint 1, but it became a dominant exposure pathway for fecal contamination, along with the solid food pathway, at Timepoint 2. As a result, different interventions would be recommended to reduce the infants' exposure substantially enough to lead to measurable health impacts.

Breast milk is universally valued for its nutritional and immunologic benefits for infants. Surprisingly, at Timepoint 1, 21.6% of breast milk samples were contaminated with *E. coli* and breastfeeding was one of the most important *sources* of exposure to fecal contamination for infants. There is no evidence that *E. coli* is secreted in breast milk.<sup>[34]</sup> In 2016, Nakamura et al.<sup>[35]</sup> reported an outbreak of extended-spectrum  $\beta$ -lactamase (ESBL) producing *E. coli* through breast milk sharing in a neonatal intensive care unit. The breast milk was exclusively contaminated from the donor mother's left breast, which she reported was not sufficiently cleaned due to a sore nipple.<sup>[35]</sup> Therefore, it is likely that the *E. coli* contamination in the breast milk samples in our study originated from the mothers' nipples and areola areas, where we detected a similar percent of positive for *E. coli* (16.7% at Timepoint 1 and 18.7% at Timepoint 2). Discussions with members of the local field team also indicated that breastfeeding practices often overlook personal hygiene measures in rural communities in Ethiopia. For breastfeeding, latching or unlatching a young infant requires the mother to put her hands on her breast, as well as in and around the infant's mouth. Many mothers, possibly due to a lack of awareness or understanding of the importance of hygienic practices,<sup>[36]</sup> feed their babies without first properly cleaning the breasts or their hands. Instances were noted during our structured observations, when a mother merely wiped the nipple with her clothes or hands before feeding the child. Our findings suggested that behavioral interventions targeting personal hygiene practices, such as handwashing and cleaning the nipple and areola area, before breastfeeding should be promoted in rural Ethiopia and areas with similar situations.

Unlike in urban settings, where concrete floor surfaces are common in households, most floors in rural households are composed of soil and cemented mud (a mixture of soil and livestock feces). In our study,

fecal contamination was widely distributed with elevated *E. coli* concentration levels in the soil samples collected in the household compound. The soil within and outside households could be contaminated with fecal material from both humans and animals. In rural communities, many households do not have latrines<sup>36</sup> and open defecation in backyards or fields is common. Meanwhile, humans and livestock often coexist under the same roof, particularly at night, resulting in animals defecating and urinating in the shared living space. In such a living environment, unintentionally ingesting soil through hand-mouthing or intentional ingestion through soil-pica could result in a large amount of exposure to fecal contamination and enteric pathogens for infants. Previous studies in<sup>37,38,20</sup> and the behavioral observation data from this study showed that soil-pica is not a rare behavior among young children. Enhancing household living environments and implementing effective animal fecal management should be considered to protect young children in rural Ethiopia.

This study had several strengths compared to previous exposure assessment research. Structured behavioral observation data with much higher resolution were collected with 60,580 infant behavior events in 1310 hours compared to our previous SaniPath study in Accra, Ghana, which only had 1846 events in 500 hours.<sup>14</sup> The behavioral data in this study were collected at the very early stages of infants' lives, when they are most vulnerable to enteric diseases. Such rich behavioral data enable us to examine the behavior differences in detail between age groups and build a more complex behavior model with two layers for duration-based and frequency-based behaviors. Environmental samples of different types were collected within the same household right after the behavioral observation, and the enumerators conducting those observations informed the sampling locations of environmental samples. This type of matched design enabled us to identify the positive correlation between the fecal contamination levels on the hands of infants, mothers, and siblings, mothers' skin (e.g., areola surface), and fomite surfaces. In addition, this study included previously overlooked exposure pathways like breastfeeding, mouthing caregivers' hands, and soil-pica and revealed surprising findings about the important role of these dominant exposure pathways for infants in rural Ethiopia. The model developed here can be generalized to quantify exposure to a variety of enteric pathogens and even chemicals in the environment.

Yet, we acknowledge some limitations underlying the study. Capturing the full spectrum of infants' behavior and exposure in their environments presents significant challenges due to the dynamic and complex nature of daily activities and interactions. Recording only the infants' behavior in pre-defined behavior types that are frequently observed may not fully account for occasional but high-risk exposure pathways,

such as touching animal fecal matter. Also, we were not able to observe the infants during specific time periods, such as right after waking up in the morning or before going to sleep at night. This could lead to potential underestimation or oversight in identifying the contributions from specific pathways to exposure to fecal contamination and enteric pathogens. Another limitation of our study comes from the logistical and operational challenges exacerbated by unforeseen external circumstances. The behavioral observations and environmental sample collection were originally planned during the developmental windows of infants ages 1–3 months old and 6–9 months old. However, the concurrent impact of the COVID-19 pandemic and geopolitical tension within the country delayed the delivery of necessary lab supplies and equipment to Haramaya University and disrupted our fieldwork schedule. Despite the delay in data collection, the adjusted timeline windows (spanning ages 4–8 months and 11–15 months) still provided valuable insights into the behavior patterns of infants in rural Ethiopia early in their life and associated exposure to fecal contamination and enteric pathogens. Infants between 4 to 8 months old (at Timepoint 1) predominantly rely on breastfeeding and exhibit limited mobility, aligning closely with our initial proposed age groups. The observation at Timepoint 2 (11–15 months old) was more distinct from the observation of the younger infants and thus offered a unique opportunity to understand evolving behavioral patterns and exposure to fecal contamination associated with growing mobility and a more diverse diet. The findings from this study have important policy implications. In rural Ethiopia, even young infants consume solid food, such as injera, which commonly has fecal contamination. Contamination of injera is most likely introduced during food handling and storage rather than its cooking process which involves a high temperature. Behavioral interventions to promote handwashing before eating and feeding for both infants and their caregivers and better food handling and storage practices are recommended. This research also highlights the need for targeted sanitation and hygiene improvement initiatives and education for expecting and breastfeeding mothers. Such efforts should include the separation of human and animal spaces, proper disposal of human and animal feces, training on animal husbandry, maintaining household cleanliness, and promoting handwashing and personal hygiene before breastfeeding and infant food preparation. These improvements are essential for reducing potential fecal-oral transmission of enteric pathogens. In addition, information about the behavioral evolution of infants during development should be integrated into maternal and child health educational and intervention programs. As infants grow and become more mobile, culturally appropriate strategies to prevent soil ingestion need to be developed and implemented.

372 Moving forward, our results suggest several directions for future research. First, expanding these research  
373 methodologies to explore exposure to specific enteric pathogens, with different ecological and biological  
374 characteristics, will offer a more holistic view of exposure risks and their mitigation. Second, conduct-  
375 ing an in-depth assessment of the challenges to promoting good personal hygiene for mothers before  
376 breastfeeding may be beneficial. Developing community-based educational and behavioral intervention  
377 programs that are culturally sensitive and socially acceptable to the community, is essential for adopting  
378 recommended practices. Finally, the exposure assessment model developed here can be used to conduct  
379 simulation studies evaluating the efficacy of specific behavioral interventions, such as campaigns to pro-  
380 mote handwashing and education on hygienic breastfeeding practices, and could guide the design and  
381 implementation of locally sustainable and effective intervention strategies.

## 382 **Conclusions**

383 This study highlights the crucial role of infant behavior, including interactions with other people and  
384 their immediate living environment, in understanding how infants are exposed to fecal contamination and  
385 enteric pathogens in rural settings of LMICs. We developed an integrated exposure assessment model  
386 framework that identified and quantified the changes in the exposure profile (e.g., dominant exposure  
387 pathways) between infants at two age periods. The findings of high exposure to fecal contamination from  
388 solid food, breast milk, and soil in this rural study setting are critical evidence for reducing infants' expo-  
389 sure risks by promoting safe food handling and storage, improved personal hygiene before breastfeeding,  
390 education on the risk of soil ingestion and measures to prevent soil-pica.

## 391 **Acknowledgements**

392 The study was supported by the Bill and Melinda Gates Foundation (INV-007705). We thank Ballo  
393 Mummed, Belisa Usmael Ahmedo, Efraha Yusuf, Ibsa Ahmed, Ibsa Fayy Abrahim, Kedir Hassen, Meri  
394 Usmael, Mussie Brhane, and Yenenesh Demisie Weldeesenbet from Haramaya University for their sub-  
395 stantial work conducting behavioral observations, sample collections, and lab analyses. We thank Dr.  
396 Peter Teunis at Emory University for his insights into developing behavior and exposure models. We  
397 thank Sarah Durry at Emory University for her insights into the study design in Ethiopia. We thank  
398 Shaolin Xiang at the University of Georgia for identifying the missing values in the behavioral data. At

last, special thanks to my children, Angelina Wangpan and Abigail Wangpan, for teaching me the basics of infant behavior.

## Data Sharing

The data utilized in this study are available upon reasonable request. The dataset includes high-resolution behavioral and microbiological sampling data collected as part of the EXCAM project. This data has been anonymized to protect the privacy of the participants. Access to the data will be granted to qualified researchers to replicate the findings or conduct further research, subject to approval by the Institutional Review Board and data use agreements to ensure ethical handling and use of the data. Researchers interested in accessing the dataset should contact the Principal Investigator, Dr. Song Liang at [songliang@umass.edu](mailto:songliang@umass.edu). Detailed metadata and documentation are available to support the understanding and use of the dataset.

## CRedit authorship contribution statement

**Yuke Wang:** Conceptualization, Methodology (Exposure Assessment, Mechanistic Modeling), Software, Formal Analysis, Writing - Original Draft. **Yang Yang:** Conceptualization, Methodology, Formal analysis, Writing - Review & Editing. **Crystal M Slanzi:** Methodology, Investigation, Writing - Review & Editing. **Xiaolong Li:** Data Curation, Formal Analysis, Writing - Review & Editing. **Amanda Ojeda:** Investigation, Project Administration, Writing - Review & Editing. **Fevi Paro:** Writing - Review & Editing. **Loïc Deblais:** Methodology, Investigation, Writing - Review & Editing. **Habib Yakubu:** Conceptualization. **Bahar Mummed Hassen:** Investigation. **Halengo Game:** Investigation. **Ibsa Fayo Abraham:** Investigation. **Kedir Teji Roba:** Investigation, Writing - Review & Editing. **Elizabeth Schieber:** Methodology, Investigation, Writing - Review & Editing. **Abdulmuen Mohammed Ibrahim:** Investigation. **Jeylan Wolyie:** Investigation. **Jemal Yusuf:** Investigation. **Gireesh Rajashekara:** Conceptualization, Methodology (Laboratory Methods, Working Definitions, etc), Investigation, Writing - Review & Editing. **Sarah L. McKune:** Conceptualization, Methodology (Field Methods, Working Definitions, etc), Investigation, Writing - Review & Editing. **Christine L. Moe:** Conceptualization, Writing - Review & Editing, Supervision. **Arie H. Havelaar:** Conceptualization, Supervision, Writing - Review & Editing. **Song Liang:** Conceptualization, Supervision, Writing - Review & Editing.



## References

- [1] Christa L Fischer Walker, Jamie Perin, Martin J Aryee, Cynthia Boschi-Pinto, and Robert E Black. Diarrhea incidence in low-and middle-income countries in 1990 and 2010: a systematic review. *BMC Public Health*, 12:1–7, 2012. doi: 10.1186/1471-2458-12-220.
- [2] Karen L Kotloff, James P Nataro, William C Blackwelder, Dilruba Nasrin, Tamer H Farag, Sandra Panchalingam, Yukun Wu, Samba O Sow, Dipika Sur, Robert F Breiman, et al. Burden and aetiology of diarrhoeal disease in infants and young children in developing countries (the Global Enteric Multicenter Study, GEMS): a prospective, case-control study. *The Lancet*, 382(9888):209–222, 2013. doi: 10.1016/S0140-6736(13)60844-2.
- [3] GBD 2016 Causes of Death Collaborators. Global, regional, and national age-sex specific mortality for 264 causes of death, 1980–2016: a systematic analysis for the Global Burden of Disease Study 2016. *The Lancet*, 390(10100):1151–1210, 2017. doi: 10.1016/S0140-6736(17)32152-9.
- [4] GBD 2016 Causes of Death Collaborators. Estimates of the global, regional, and national morbidity, mortality, and aetiologies of diarrhoea in 195 countries: a systematic analysis for the Global Burden of Disease Study 2016. *The Lancet Infectious Diseases*, 18(11):1211–1228, 2018. doi: 10.1016/S1473-3099(18)30362-1.
- [5] Richard L Guerrant, Reinaldo B Oriá, Sean R Moore, Mônica OB Oriá, and Aldo AM Lima. Malnutrition as an enteric infectious disease with long-term effects on child development. *Nutrition Reviews*, 66(9):487–505, 2008. doi: 10.1111/j.1753-4887.2008.00082.x.
- [6] Dinesh Mondal, Juliana Minak, Masud Alam, Yue Liu, Jing Dai, Poonum Korpe, Lei Liu, Rashidul Haque, and William A Petri Jr. Contribution of enteric infection, altered intestinal barrier function, and maternal malnutrition to infant malnutrition in Bangladesh. *Clinical Infectious Diseases*, 54(2): 185–192, 2012. doi: 10.1093/cid/cir807.
- [7] David I Guerrant, Sean R Moore, Aldo A Lima, Peter D Patrick, John B Schorling, and Richard L Guerrant. Association of early childhood diarrhea and cryptosporidiosis with impaired physical fitness and cognitive function four-seven years later in a poor urban community in northeast Brazil. *The American Journal of Tropical Medicine and Hygiene*, 61(5):707–713, 1999. doi: 10.4269/ajtmh.1999.61.707.

- 454 [8] Kirkby D Tickell, Hannah E Atlas, and Judd L Walson. Environmental enteric dysfunction: a review  
455 of potential mechanisms, consequences and management strategies. *BMC Medicine*, 17:1–9, 2019.  
456 doi: 10.1186/s12916-019-1417-3.
- 457 [9] Frederick GB Goddard, Radu Ban, Dana Boyd Barr, Joe Brown, Jennifer Cannon, John M Col-  
458 ford Jr, Joseph NS Eisenberg, Ayse Ercumen, Helen Petach, Matthew C Freeman, et al. Measuring  
459 environmental exposure to enteric pathogens in low-income settings: review and recommendations  
460 of an interdisciplinary working group. *Environmental Science & Technology*, 54(19):11673–11691,  
461 2020. doi: 10.1021/acs.est.0c02421.
- 462 [10] Timothy R Julian and Amy J Pickering. A pilot study on integrating videography and environmental  
463 microbial sampling to model fecal bacterial exposures in peri-urban Tanzania. *PLoS One*, 10(8):  
464 e0136158, 2015. doi: 10.1371/journal.pone.0136158.
- 465 [11] Christine L Moe and Richard D Rheingans. Global challenges in water, sanitation and health.  
466 *Journal of Water and Health*, 4(S1):41–57, 2006. doi: 10.2166/wh.2006.0043.
- 467 [12] Oliver Cumming, Benjamin F Arnold, Radu Ban, Thomas Clasen, Joanna Esteves Mills, Matthew C  
468 Freeman, Bruce Gordon, Raymond Guiteras, Guy Howard, Paul R Hunter, Richard B Johnston,  
469 Amy J Pickering, Andrew J Prendergast, Annette Prüss-Ustün, Jan Willem Rosenboom, Dean  
470 Spears, Shelly Sundberg, Jennyfer Wolf, Clair Null, Stephen P Luby, Jean H Humphrey, and John M  
471 Colford Jr. The implications of three major new trials for the effect of water, sanitation and hygiene  
472 on childhood diarrhea and stunting: a consensus statement. *BMC Medicine*, 17:1–9, 2019. doi:  
473 10.1186/s12916-019-1410-x.
- 474 [13] Amy J Pickering, Sammy M Njenga, Lauren Steinbaum, Jenna Swarthout, Audrie Lin, Ben-  
475 jamin F Arnold, Christine P Stewart, Holly N Dentz, MaryAnne Mureithi, Benard Chieng, Marlene  
476 Wolfe, Ryan Mahoney, Jimmy Kihara, Kendra Byrd, Gouthami Rao, Theodora Meerkerk, Priscah  
477 Cheruiyot, Marina Papaiakevou, Nils Pilotte, Steven A Williams, John M. Colford Jr., and Clair  
478 Null. Effects of single and integrated water, sanitation, handwashing, and nutrition interventions  
479 on child soil-transmitted helminth and *Giardia* infections: A cluster-randomized controlled trial in  
480 rural Kenya. *PLoS Medicine*, 16(6):e1002841, 2019. doi: 10.1371/journal.pmed.1002841.
- 481 [14] Peter FM Teunis, Heather E Reese, Clair Null, Habib Yakubu, and Christine L Moe. Quantifying

- 482 contact with the environment: behaviors of young children in Accra, Ghana. *The American journal*  
483 *of tropical medicine and hygiene*, 94(4):920, 2016. doi: 10.4269/ajtmh.15-0417.
- 484 [15] Katharine Robb, Clair Null, Peter Teunis, Habib Yakubu, George Armah, and Christine L Moe.  
485 Assessment of fecal exposure pathways in low-income urban neighborhoods in Accra, Ghana: ra-  
486 tionale, design, methods, and key findings of the SaniPath study. *The American Journal of Tropical*  
487 *Medicine and Hygiene*, 97(4):1020, 2017. doi: 10.4269/ajtmh.16-0508.
- 488 [16] Yuke Wang, Christine L Moe, Clair Null, Suraja J Raj, Kelly K Baker, Katharine A Robb, Habib  
489 Yakubu, Joseph A Ampofo, Nii Wellington, Matthew C Freeman, et al. Multipathway quantita-  
490 tive assessment of exposure to fecal contamination for young children in low-income urban envi-  
491 ronments in Accra, Ghana: the SaniPath analytical approach. *The American Journal of Tropical*  
492 *Medicine and Hygiene*, 97(4):1009, 2017. doi: 10.4269/ajtmh.16-0408.
- 493 [17] Yuke Wang, Wolfgang Mairinger, Suraja J Raj, Habib Yakubu, Casey Siesel, Jamie Green, Sarah  
494 Durry, George Joseph, Mahbubur Rahman, Nuhu Amin, et al. Quantitative assessment of exposure  
495 to fecal contamination in urban environment across nine cities in low-income and lower-middle-  
496 income countries and a city in the united states. *Science of the Total Environment*, 806:151273,  
497 2022. doi: 10.1016/j.scitotenv.2021.151273.
- 498 [18] Kelly K Baker, Jane Awiti Odhiambo Mumma, Sheillah Simiyu, Daniel Sewell, Kevin Tsai,  
499 John David Anderson, Amy MacDougall, Robert Dreibelbis, and Oliver Cumming. Environmen-  
500 tal and behavioural exposure pathways associated with diarrhoea and enteric pathogen detection  
501 in 5-month-old, periurban Kenyan infants: a cross-sectional study. *BMJ open*, 12(10), 2022. doi:  
502 10.1136/bmjopen-2021-059878.
- 503 [19] Valerie Bauza, Vincent Madadi, Robinson Ocharo, Thanh H Nguyen, and Jeremy S Guest. Enteric  
504 pathogens from water, hands, surface, soil, drainage ditch, and stream exposure points in a low-  
505 income neighborhood of Nairobi, Kenya. *Science of the Total Environment*, 709:135344, 2020. doi:  
506 10.1016/j.scitotenv.2019.135344.
- 507 [20] Jean H Humphrey, Mduduzi NN Mbuya, Robert Ntozini, Lawrence H Moulton, Rebecca J Stoltz-  
508 fus, Naume V Tavengwa, Kuda Mutasa, Florence Majo, Batsirai Mutasa, Goldberg Mangwadu,  
509 Cynthia M Chasokela, Ancikaria Chigumira, Bernard Chasekwa, Laura E Laura E Smith, James M

- 510 Tielsch, Andrew D Jones, Amee R Manges, John A Maluccio, Andrew J Prendergast, and for the  
511 Sanitation Hygiene Infant Nutrition Efficacy (SHINE) Trial Team. Independent and combined ef-  
512 fects of improved water, sanitation, and hygiene, and improved complementary feeding, on child  
513 stunting and anaemia in rural Zimbabwe: a cluster-randomised trial. *The Lancet Global Health*, 7  
514 (1):e132–e147, 2019. doi: 10.1016/S2214-109X(18)30374-7.
- 515 [21] Laura H Kwong, Ayse Ercumen, Amy J Pickering, Leanne Unicomb, Jennifer Davis, and Stephen P  
516 Luby. Age-related changes to environmental exposure: variation in the frequency that young chil-  
517 dren place hands and objects in their mouths. *Journal of Exposure Science & Environmental Epi-*  
518 *demiology*, 30(1):205–216, 2020. doi: 10.1038/s41370-019-0115-8.
- 519 [22] Amy J Pickering, Ayse Ercumen, Benjamin F Arnold, Laura H Kwong, Sarker Masud Parvez,  
520 Mahfuja Alam, Debashis Sen, Sharmin Islam, Craig Kullmann, Claire Chase, et al. Fecal indicator  
521 bacteria along multiple environmental transmission pathways (water, hands, food, soil, flies) and  
522 subsequent child diarrhea in rural Bangladesh. *Environmental Science & Technology*, 52(14):7928–  
523 7936, 2018. doi: doi:10.1021/acs.est.8b00928.
- 524 [23] Yitagele Terefe, Loïc Deblais, Mostafa Ghanem, Yosra A Helmy, Bahar Mummmed, Dehao Chen,  
525 Nitya Singh, Vida Ahyong, Katrina Kalantar, Getnet Yimer, Jemal Yousuf Hassen, Abdulmuen  
526 Mohammed, Sarah L McKune, Mark J Manary, Maria Isabel Ordiz, Wondwossen Gebreyes, Arie H  
527 Havelaar, and Gireesh Rajashekara. Co-occurrence of *Campylobacter* species in children from  
528 eastern Ethiopia, and their association with environmental enteric dysfunction, diarrhea, and host  
529 microbiome. *Frontiers in Public Health*, 8:99, 2020. doi: 10.3389/fpubh.2020.00099.
- 530 [24] Kevin Louis Bardosh, Jeylan Wolyie Hussein, Elias Ahmed Sadik, Jemal Yousuf Hassen, Mengistu  
531 Ketema, Abdulmuen Mohammed Ibrahim, Sarah Lindley McKune, and Arie Hendrik Havelaar.  
532 Chicken eggs, childhood stunting and environmental hygiene: an ethnographic study from the  
533 *Campylobacter* Genomics and Environmental Enteric Dysfunction (CAGED) project in Ethiopia.  
534 *One Health Outlook*, 2:1–15, 2020. doi: 10.1186/s42522-020-00012-9.
- 535 [25] Dehao Chen, Sarah L McKune, Nitya Singh, Jemal Yousuf Hassen, Wondwossen Gebreyes, Mark J  
536 Manary, Kevin Bardosh, Yang Yang, Nicholas Diaz, Abdulmuen Mohammed, Yitagele Terefe,  
537 Kedir Teji Roba, Mengistu Ketema, Negassi Ameha, Nega Assefa, Gireesh Rajashekara, Loïc

- 538 Deblais, Mostafa Ghanem, Getnet Yimer, and Arie H Havelaar. *Campylobacter* colonization,  
539 environmental enteric dysfunction, stunting, and associated risk factors among young children  
540 in rural Ethiopia: a cross-sectional study from the *Campylobacter* Genomics and Environmen-  
541 tal Enteric Dysfunction (CAGED) project. *Frontiers in Public Health*, 8:615793, 2021. doi:  
542 10.3389/fpubh.2020.615793.
- 543 [26] Arie H Havelaar, Mussie Brhane, Ibsa Abdusemed Ahmed, Jafer Kedir, Dehao Chen, Loic Deblais,  
544 Nigel French, Wondwossen A Gebreyes, Jemal Yousuf Hassen, Xiaolong Li, et al. Unravelling  
545 the reservoirs for colonisation of infants with *Campylobacter* spp. in rural Ethiopia: protocol for  
546 a longitudinal study during a global pandemic and political tensions. *BMJ open*, 12(10):e061311,  
547 2022. doi: 10.1136/bmjopen-2022-061311.
- 548 [27] Loïc Deblais, Amanda Ojeda, Mussie Brhane, Bahar Mummed, Kedir A Hassen, Belisa Usmael  
549 Ahmedo, Yenenesh Demisie Weldesenbet, Jafer Kedir Amin, Ibsa Abdusemed Ahmed, Ibsa Aliyi  
550 Usmane, Efrahi Ali Yusuf, Abadir Jemal Seran, Fayol Ibrahim, Halengo T Game, Ballo A  
551 Mummed, Meri M Usmael, Kunuza Adem Umer, Mawardi M Dawid, Wondwossen Gebreyes, Nigel  
552 French, Jemal Yousuf Hassen, Kedir Teji Roba, Abdulmuen Mohammed, Getnet Yimer, Cyrus  
553 Saleem, Dehao Chen, Nitya Singh, Mark J Manary, Sarah L McKune, Arie H Havelaar, and Gireesh  
554 Rajashekara. Prevalence and load of the campylobacter genus in infants and associated household  
555 contacts in rural eastern Ethiopia: a longitudinal study from the *Campylobacter* Genomics and En-  
556 vironmental Enteric Dysfunction (CAGED) project. *Applied and Environmental Microbiology*, 89  
557 (7):e00424–23, 2023. doi: 10.1128/aem.00424-23.
- 558 [28] Digital Taco, v. D. P.-G. *Countee*. in (version 2.2.1). <https://www.counteeapp.com>, 2020.
- 559 [29] Crystal M Slanzi and Jonathan K Fernand. On the use and benefits of electronic data collec-  
560 tion systems: A tutorial on Countee. *Behavior Analysis in Practice*, In Press. doi: 10.1007/  
561 s40617-024-00964-8.
- 562 [30] Loïc Deblais, Belisa Usmael Ahmedo, Amanda Ojeda, Bahar Mummed, Yuke Wang, Yitagele  
563 Terefe Mekonnen, Yenenesh Demisie Weldesenbet, Kedir Hassen, Mussie Brhane, Sarah L McK-  
564 une, Arie Havelaar, Song Liang, and Gireesh Rajashekara. Assessing fecal contamination from  
565 human and environmental sources using *Escherichia coli* as an indicator in rural eastern Ethiopian

- 566 households - a study from the EXCAM project. *medRxiv*, 2024. doi: 10.1101/2024.08.21.24312392.
- 567 URL <https://www.medrxiv.org/content/early/2024/08/23/2024.08.21.24312392>
- 568 [31] Martyn Plummer. JAGS: A program for analysis of Bayesian graphical models using Gibbs sam-  
569 pling, 2003.
- 570 [32] Yuke Wang, Christine L Moe, and Peter FM Teunis. Children are exposed to fecal contamination  
571 via multiple interconnected pathways: a network model for exposure assessment. *Risk Analysis*, 38  
572 (11):2478–2496, 2018. doi: 10.1111/risa.13146.
- 573 [33] R Core Team. *R: A Language and Environment for Statistical Computing*. R Foundation for Statis-  
574 tical Computing, Vienna, Austria, 2013. URL <http://www.R-project.org/> ISBN 3-900051-  
575 07-0.
- 576 [34] Robert M Lawrence and Ruth A Lawrence. Breast milk and infection. *Clinics in Perinatology*, 31  
577 (3):501–528, 2004. doi: 10.1016/j.clp.2004.03.019.
- 578 [35] K Nakamura, M Kaneko, Y Abe, N Yamamoto, H Mori, A Yoshida, K Ohashi, S Miura, TT Yang,  
579 N Momoi, et al. Outbreak of extended-spectrum  $\beta$ -lactamase-producing *Escherichia coli* transmit-  
580 ted through breast milk sharing in a neonatal intensive care unit. *Journal of Hospital Infection*, 92  
581 (1):42–46, 2016. doi: 10.1016/j.jhin.2015.05.002.
- 582 [36] Abera Aregawi Berhe, Abraham Desta Aregay, Alemnesh Araya Abreha, Asfawosen Berhe Are-  
583 gay, Ataklti Weldegebrial Gebretsadik, Degnesh Zigta Negash, Equbay Gebru Gebreegziabher,  
584 Kiros Ghebremedhin Demoz, Kiros Ajemu Fenta, Nega Bezabih Mamo, et al. Knowledge, attitude,  
585 and practices on water, sanitation, and hygiene among rural residents in Tigray region, northern  
586 Ethiopia. *Journal of Environmental and Public Health*, 2020, 2020. doi: 10.1155/2020/5460168.
- 587 [37] Edward J Calabrese and Edward J Stanek. Soil pica: not a rare event. *Journal of Environmental*  
588 *Science & Health Part A*, 28(2):373–384, 1993. doi: 10.1080/10934529309375884.
- 589 [38] Jacqueline Moya and Linda Phillips. A review of soil and dust ingestion studies for children. *Journal*  
590 *of Exposure Science & Environmental Epidemiology*, 24(6):545–554, 2014. doi: 10.1038/jes.2014.  
591 17.

## 592 Tables

Table 1: Descriptive statistics of child behavior during structured observations at two timepoints.

|                                                    | Timepoint 1<br>(May–Dec 2021) | Timepoint 2<br>(Dec 2021–June 2022) |
|----------------------------------------------------|-------------------------------|-------------------------------------|
| # subjects                                         | 79                            | 76                                  |
| mean age (range) in days                           | 184 (132–263)                 | 371 (338–466)                       |
| duration of observation (hours)                    | 702                           | 608                                 |
| # duration-based activity transitions              | 3315                          | 2787                                |
| average % of time spent awake                      | 60.9                          | 76.0                                |
| average % of time spent bathing                    | 0.3                           | 0.3                                 |
| average % of time spent drinking                   | 16.9                          | 11.7                                |
| average % of time spent sleeping                   | 21.9                          | 12.1                                |
| # frequency-based activities                       | 23,677                        | 30,801                              |
| rate of eating (times per hour)                    | 0.35                          | 2.20                                |
| rate of mouthing (times per hour)                  | 13.13                         | 10.69                               |
| rate of pica (times per hour)                      | 0.05                          | 0.67                                |
| rate of touching (times per hour)                  | 20.07                         | 37.11                               |
| # compartment transitions                          | 2688                          | 3632                                |
| average % of time spent carried by mother          | 40.3                          | 27.0                                |
| average % of time spent carried by other           | 14.4                          | 6.9                                 |
| average % of time spent on the bare ground         | 0.2                           | 16.4                                |
| average % of time spent on a surface with barriers | 45.1                          | 49.8                                |
| # location transitions                             | 47                            | 149                                 |
| average % of time spent out of homestead           | 0.4                           | 2.2                                 |
| average % of time spent within homestead           | 99.6                          | 97.8                                |

Table 2: Rate of subcategory duration-based behaviors and drinking behavior during the structured observations at two timepoints.

| Rate of <i>events</i> (times per hour) | Timepoint 1<br>(May–Dec 2021) | Timepoint 2<br>(Dec 2021–June 2022) |
|----------------------------------------|-------------------------------|-------------------------------------|
| drinking breast milk                   | 1.67                          | 1.45                                |
| drinking water                         | 0.13                          | 0.23                                |
| drinking other                         | 0.22                          | 0.28                                |
| eating injera                          | 0.17                          | 0.98                                |
| eating raw produce                     | 0.001                         | 0.04                                |
| eating other                           | 0.18                          | 1.18                                |
| mouthings own hands                    | 8.84                          | 4.55                                |
| mouthings mother’s hands               | 0.59                          | 0.22                                |
| mouthings other adult’s hands          | 0.28                          | 0.08                                |
| mouthings other child’s hands          | 0.21                          | 0.13                                |
| mouthings fomites                      | 3.21                          | 5.72                                |
| pica feces                             | 0                             | 0.002                               |
| pica soil                              | 0.003                         | 0.36                                |
| pica other                             | 0.04                          | 0.31                                |
| touching mother’s hands                | 8.80                          | 9.33                                |
| touching other adult’s hands           | 3.99                          | 4.41                                |
| touching other child’s hands           | 3.38                          | 5.17                                |
| touching livestock                     | 0.02                          | 0.09                                |
| touching fomites                       | 3.88                          | 18.10                               |



Table 3: Detection and concentration of *E. coli* in environmental samples at two timepoints.

| Sample Type         | Timepoint | N   | Percent of <i>E. coli</i> positive | Log10 Mean (Range) Concentration in Positive Samples | Unit              |
|---------------------|-----------|-----|------------------------------------|------------------------------------------------------|-------------------|
| Areola Swab         | 1         | 78  | 16.7                               | 1.11 (0.68–1.53)                                     | per swab          |
|                     | 2         | 75  | 18.7                               | 2.21 (0.68–3.32)                                     | per swab          |
| Breast Milk*        | 1         | 51  | 21.6                               | 1.95 (0.70–2.86)                                     | per mL            |
|                     | 2         | 69  | 2.9                                | 1.35 (0.70–1.60)                                     | per mL            |
| Mother Handrinse    | 1         | 79  | 81.0                               | 3.64 (1.34–5.05)                                     | per pair of hands |
|                     | 2         | 76  | 84.2                               | 4.26 (1.34–6.05)                                     | per pair of hands |
| Sibling Handrinse   | 1         | 64  | 89.1                               | 5.29 (1.34–7.05)                                     | per pair of hands |
|                     | 2         | 62  | 85.5                               | 4.33 (1.34–6.05)                                     | per pair of hands |
| Infant Handrinse**† | 1         | 79  | 51.9                               | 2.63 (1.34–4.05)                                     | per pair of hands |
|                     | 2         | 76  | 77.6                               | 3.63 (1.34–5.05)                                     | per pair of hands |
| Bathing Water       | 1         | 24  | 91.7                               | 2.40 (-0.96–3.74)                                    | per mL            |
|                     | 2         | 21  | 81.0                               | 0.71 (-0.96–1.74)                                    | per mL            |
| Drinking Water*     | 1         | 75  | 77.3                               | 0.08 (-0.96–1.32)                                    | per mL            |
|                     | 2         | 76  | 51.3                               | -0.30 (-0.96–0.75)                                   | per mL            |
| Fomites†            | 1         | 129 | 63.6                               | 2.07 (0.63–3.27)                                     | per sponge        |
|                     | 2         | 145 | 56.6                               | 3.55 (0.63–5.27)                                     | per sponge        |
| Food                | 1         | 34  | 35.3                               | 2.51 (0.63–3.39)                                     | per gram          |
|                     | 2         | 68  | 25.0                               | 3.35 (0.63–4.27)                                     | per gram          |
| Soil                | 1         | 0   |                                    |                                                      |                   |
|                     | 2         | 57  | 98.2                               | 5.94 (3.57–7.35)                                     | per boot sock     |
| Total               | 1         | 613 | 58.7                               |                                                      |                   |
|                     | 2         | 725 | 55.6                               |                                                      |                   |

\*The difference in the percent of samples *E. coli* positive is significant between the two timepoints with a significance level of 0.05. †The difference in mean log10 *E. coli* concentrations is significant between the two timepoints with a significance level of 0.05. Food includes injera, cow milk, rice, macaroni, biscuits, etc. Fomites include tea cups, baby bottles, mobile phones, etc.

## 593 Figure Captions

Figure 1: Illustration of inhomogeneous Poisson process simulation.

Figure 2: Exposure Model structure. Time is denoted as  $T$ . State ( $S$ ) is a combination of behavior ( $BEH$ ) and compartment ( $COMP$ ). Competing Hazard model will generate the next time ( $T$ ) and state ( $S$ ) until  $T_n - T_0 > 14$  hours. Modules determined by behavior sequences calculate the microbes on hands ( $NH$ ) and microbes ingested ( $NI$ ).

Figure 3: Average contribution (in percentage) of exposure to *E. coli* over 10,000 simulated child days by source and timepoint. The color represents the average daily exposure from a specific *source*.

Figure 4: Fecal microbe transfer networks averaged over 10,000 simulated child days for children at Timepoint 1, subfigure (a), and Timepoint 2, subfigure (b). The size of arrows and edges are proportional to the  $\log_{10}$  of the average numbers of fecal microbes transferred (for 10,000 simulated child days). The color of nodes represents their role in the network. Red: *sources*; yellow: *vehicles* (can be source and sink); green: *sinks* (remove contamination); purple: *ingestion*.

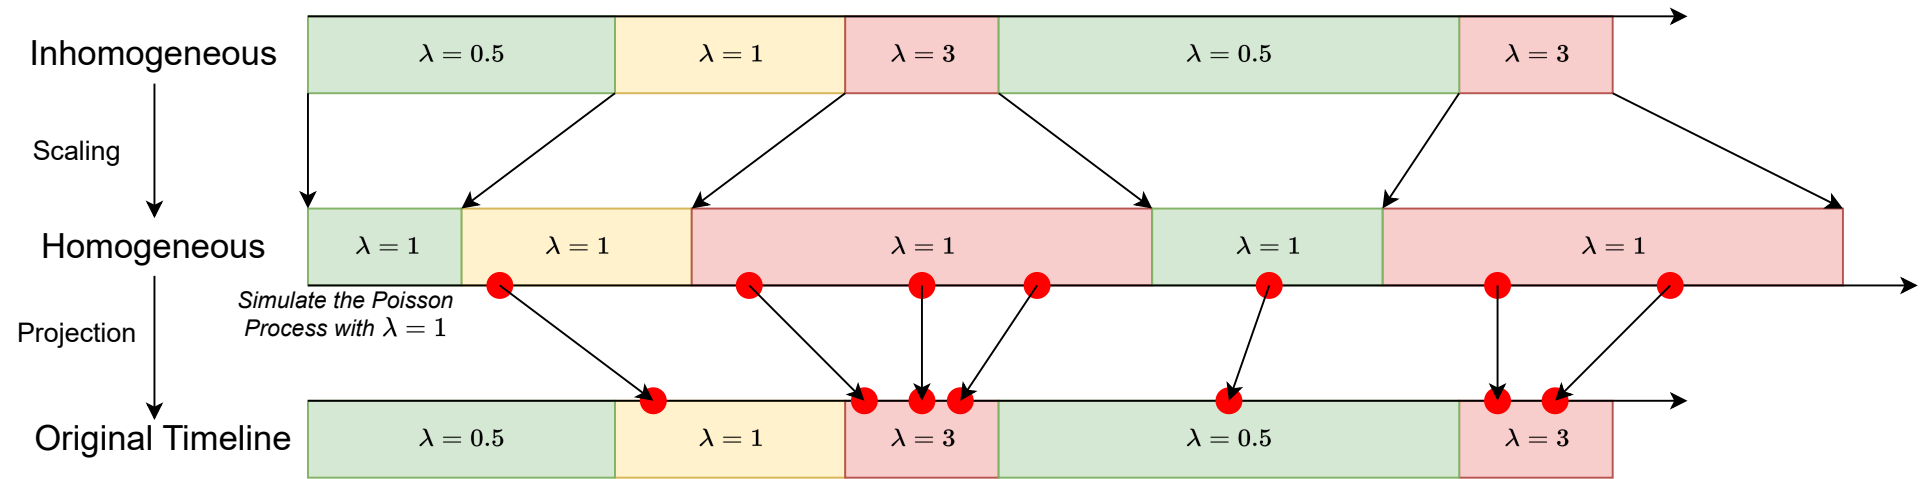

# Duration-based Behavior

# Frequency-based Behavior

# Hand Microbe

# Ingested Microbe

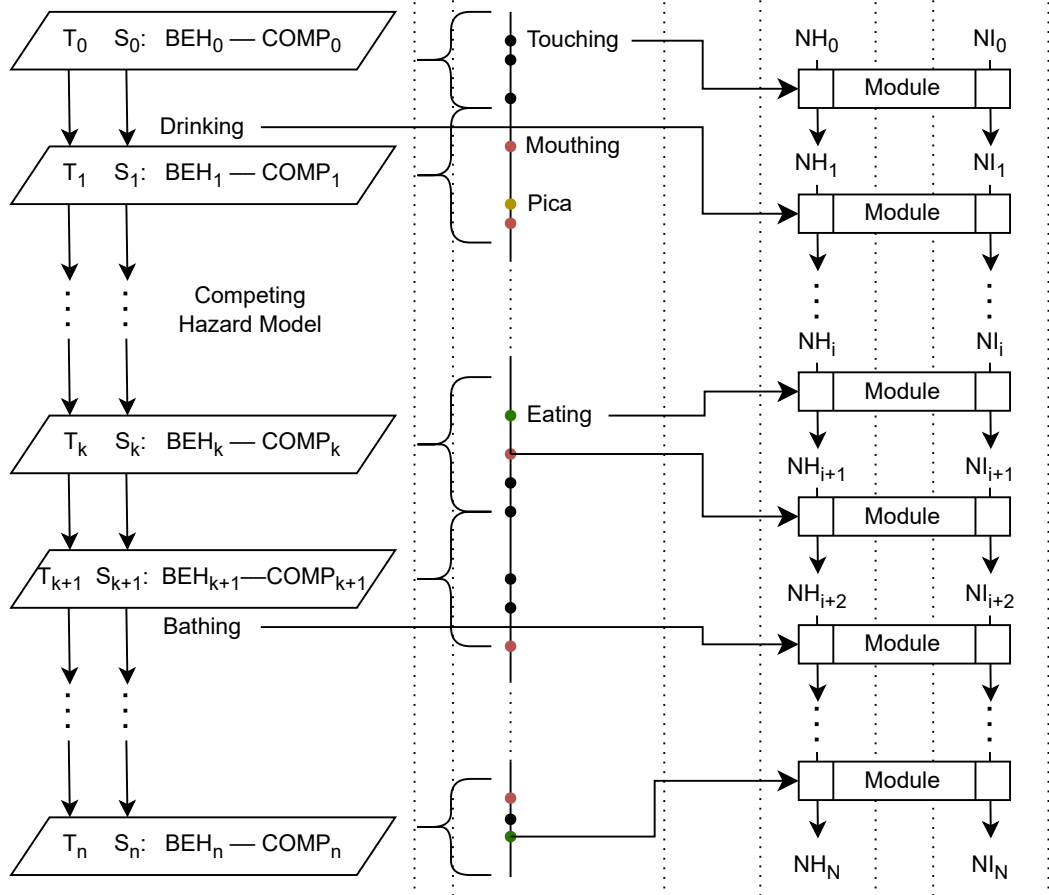

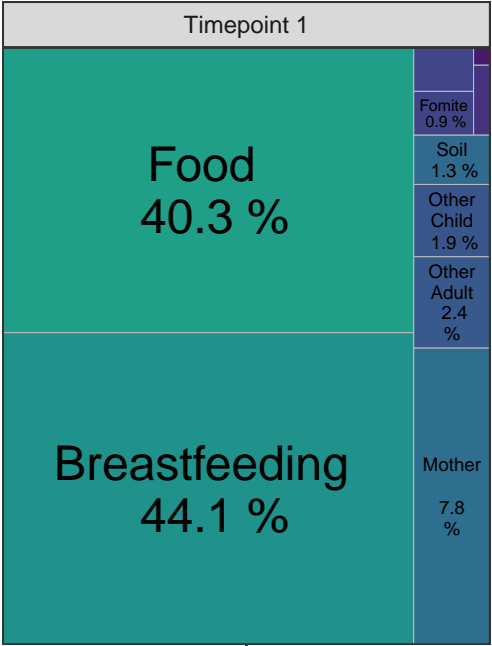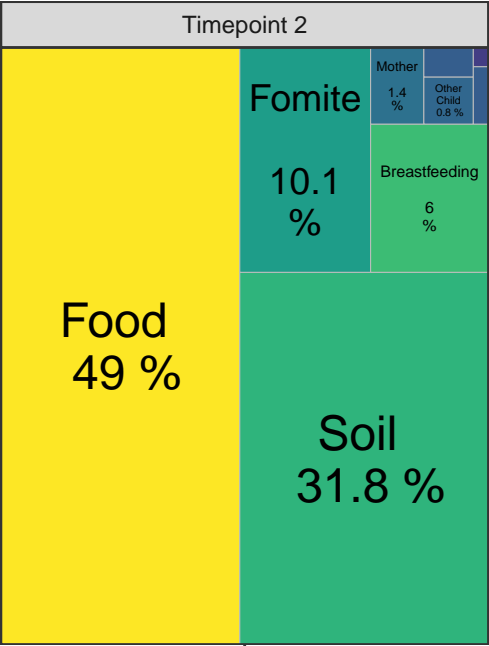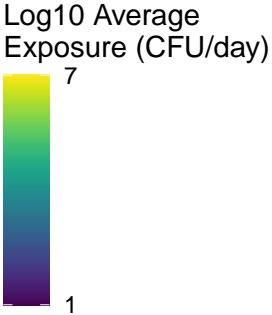

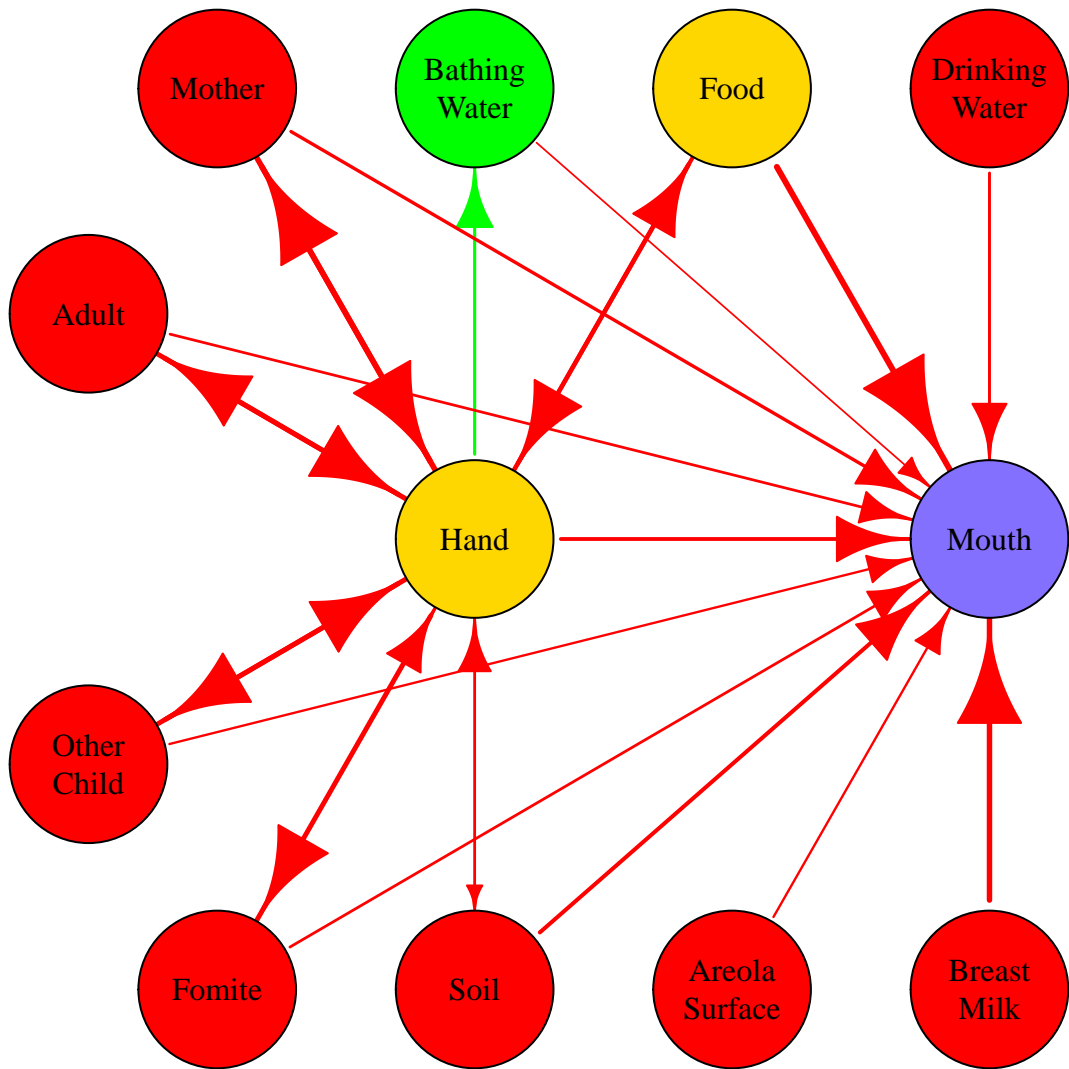

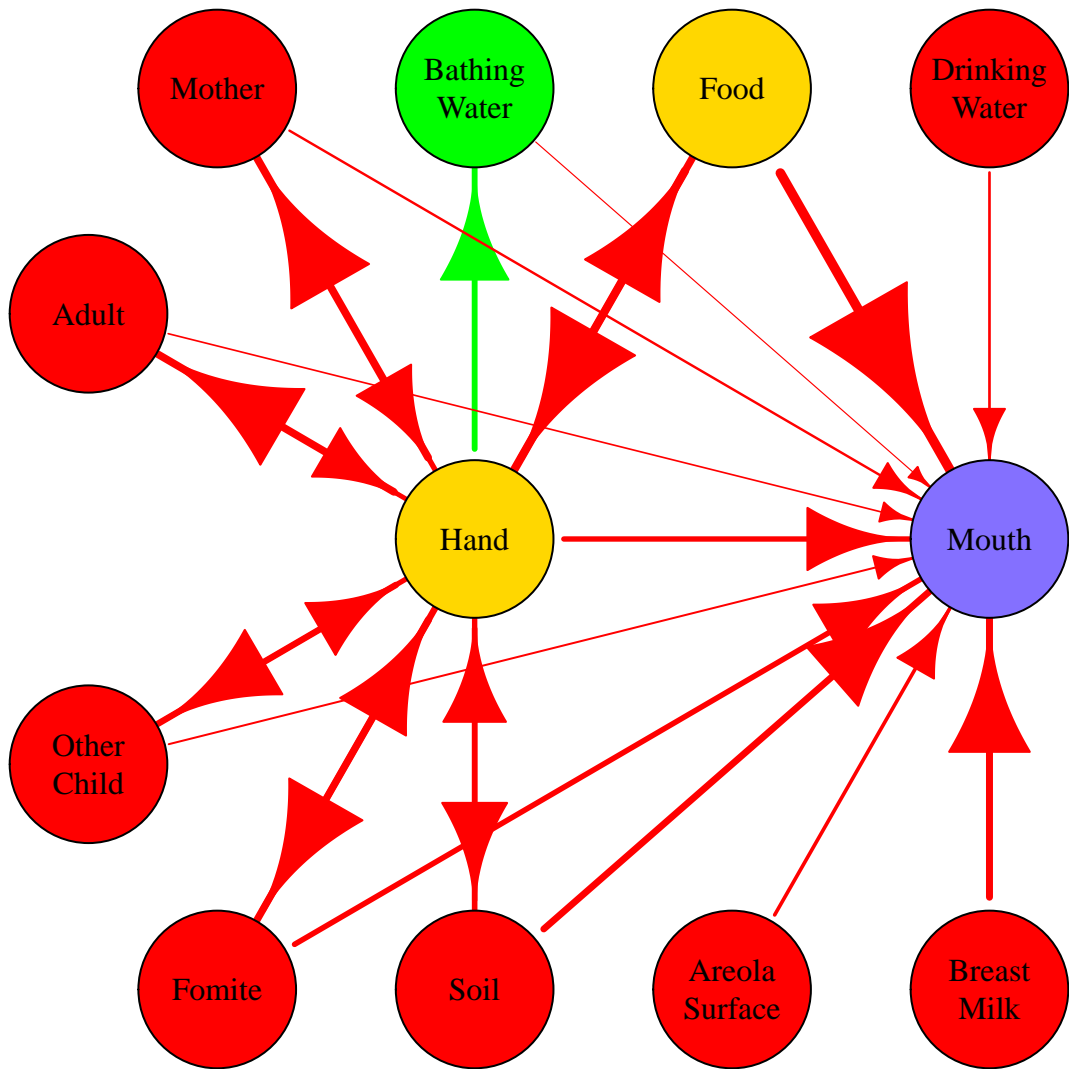

Proportion

Activity

Compartment

Location

Timepoint

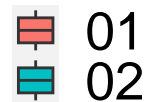

1.00  
0.75  
0.50  
0.25  
0.00

Awake

Bathing

Drinking

Sleeping

Carried by mother

Carried by other

On a surface with barriers

On the bare ground

Out of homestead

Within homestead

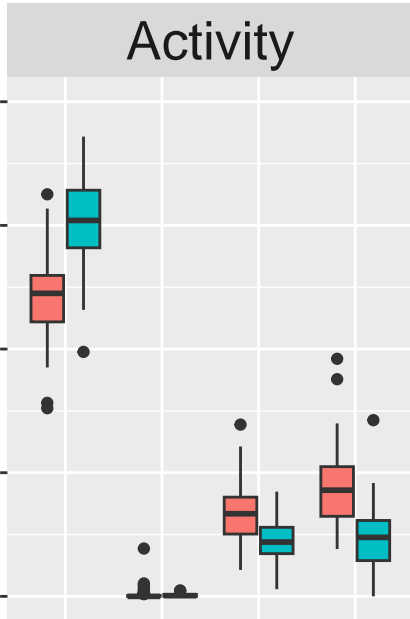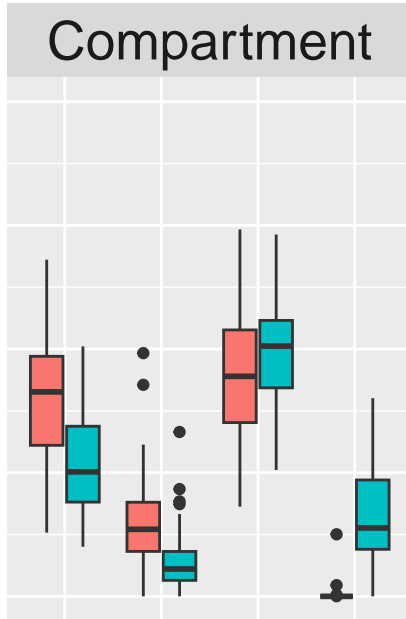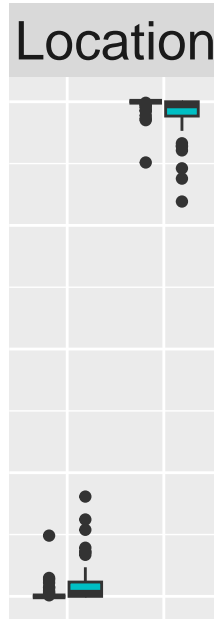



Rate

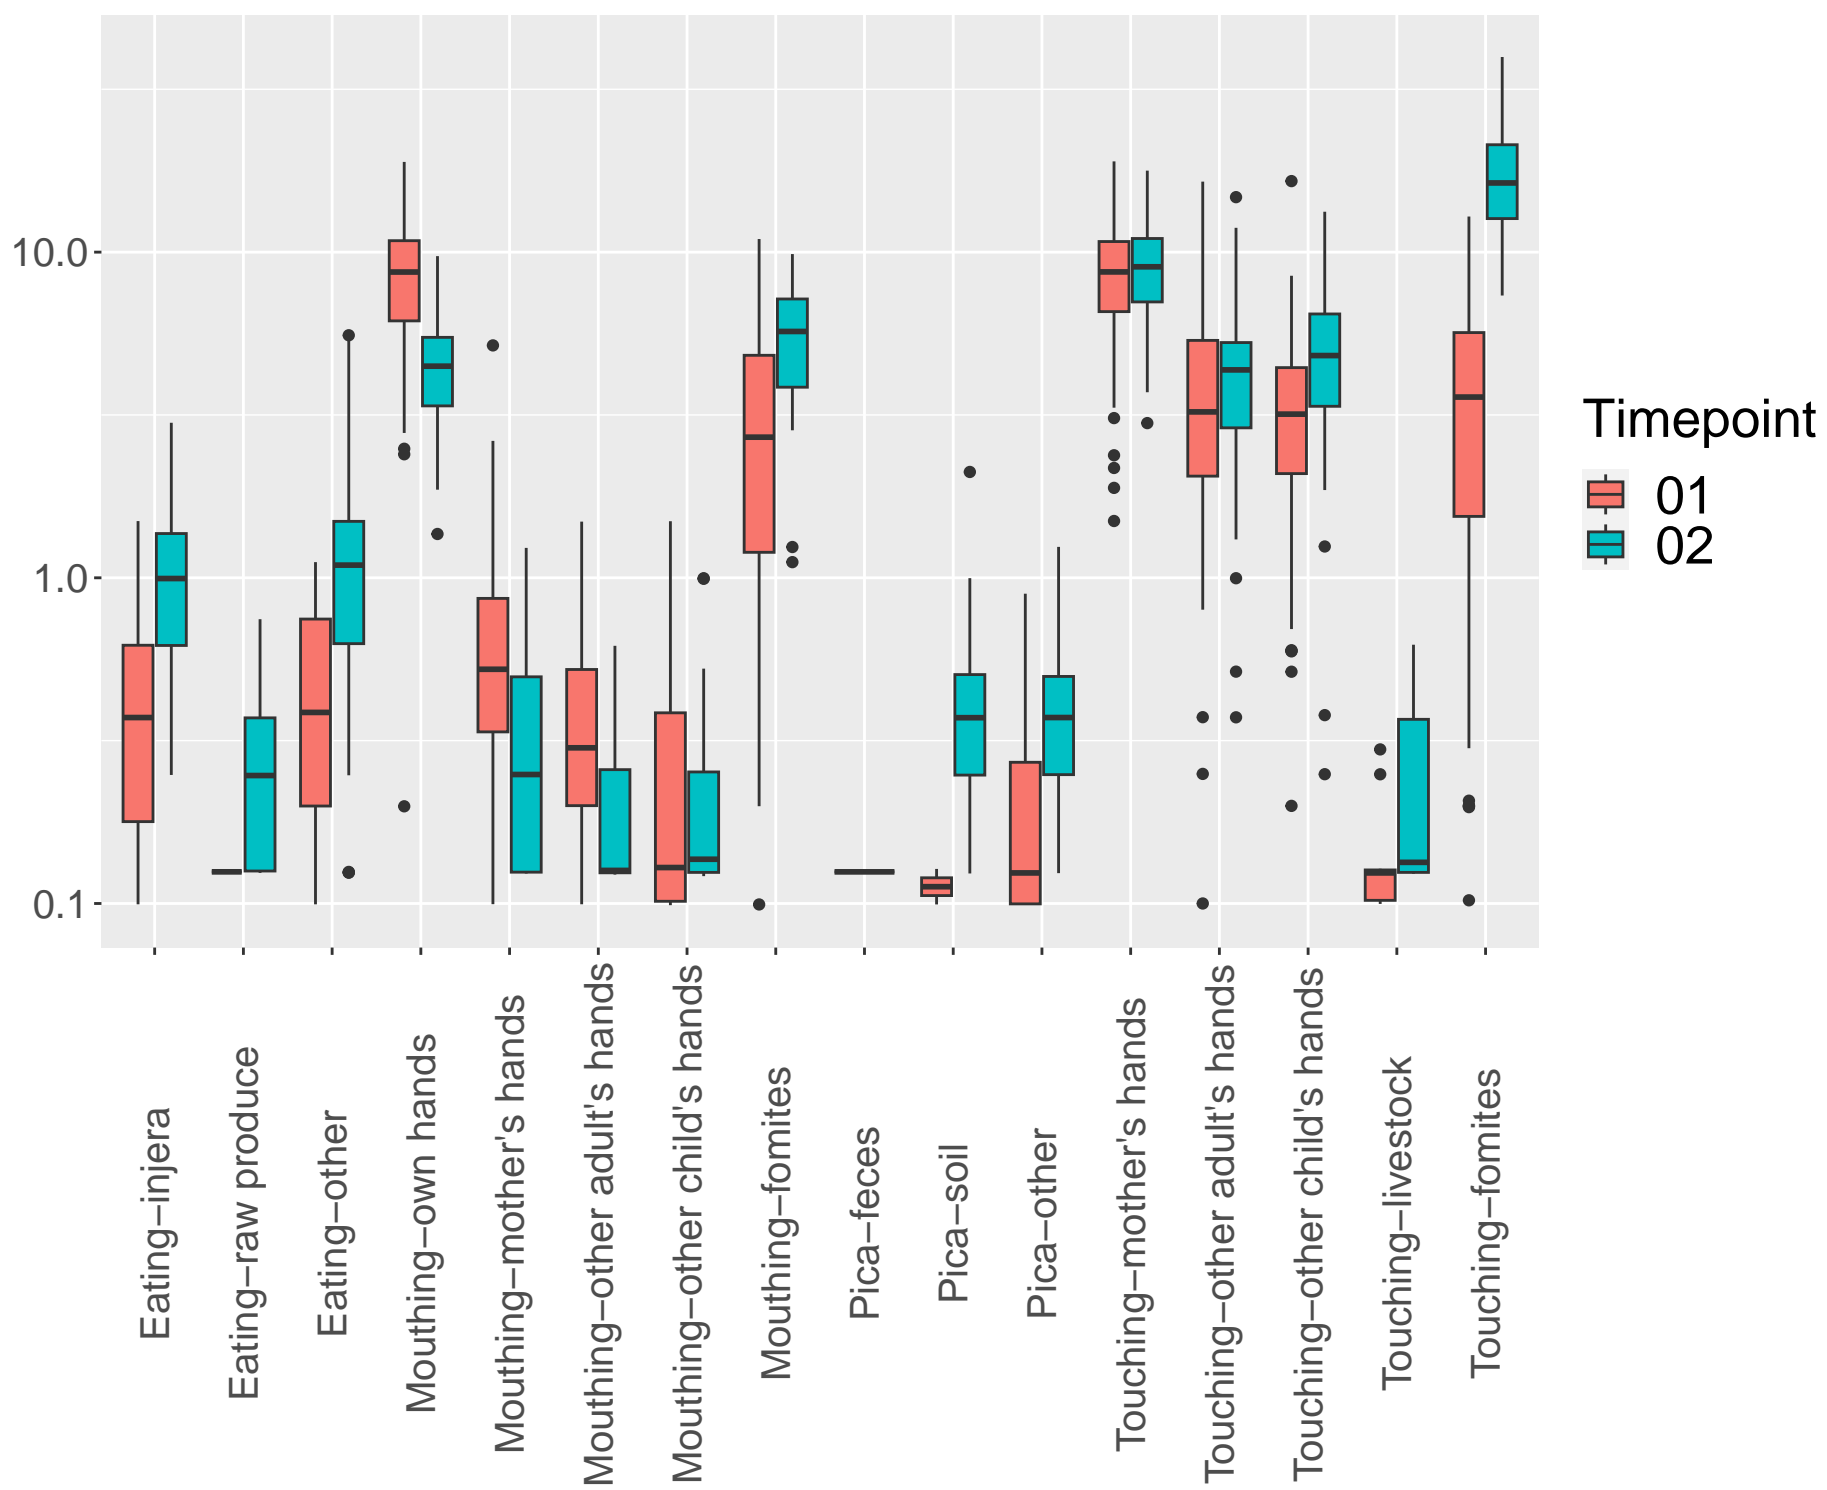

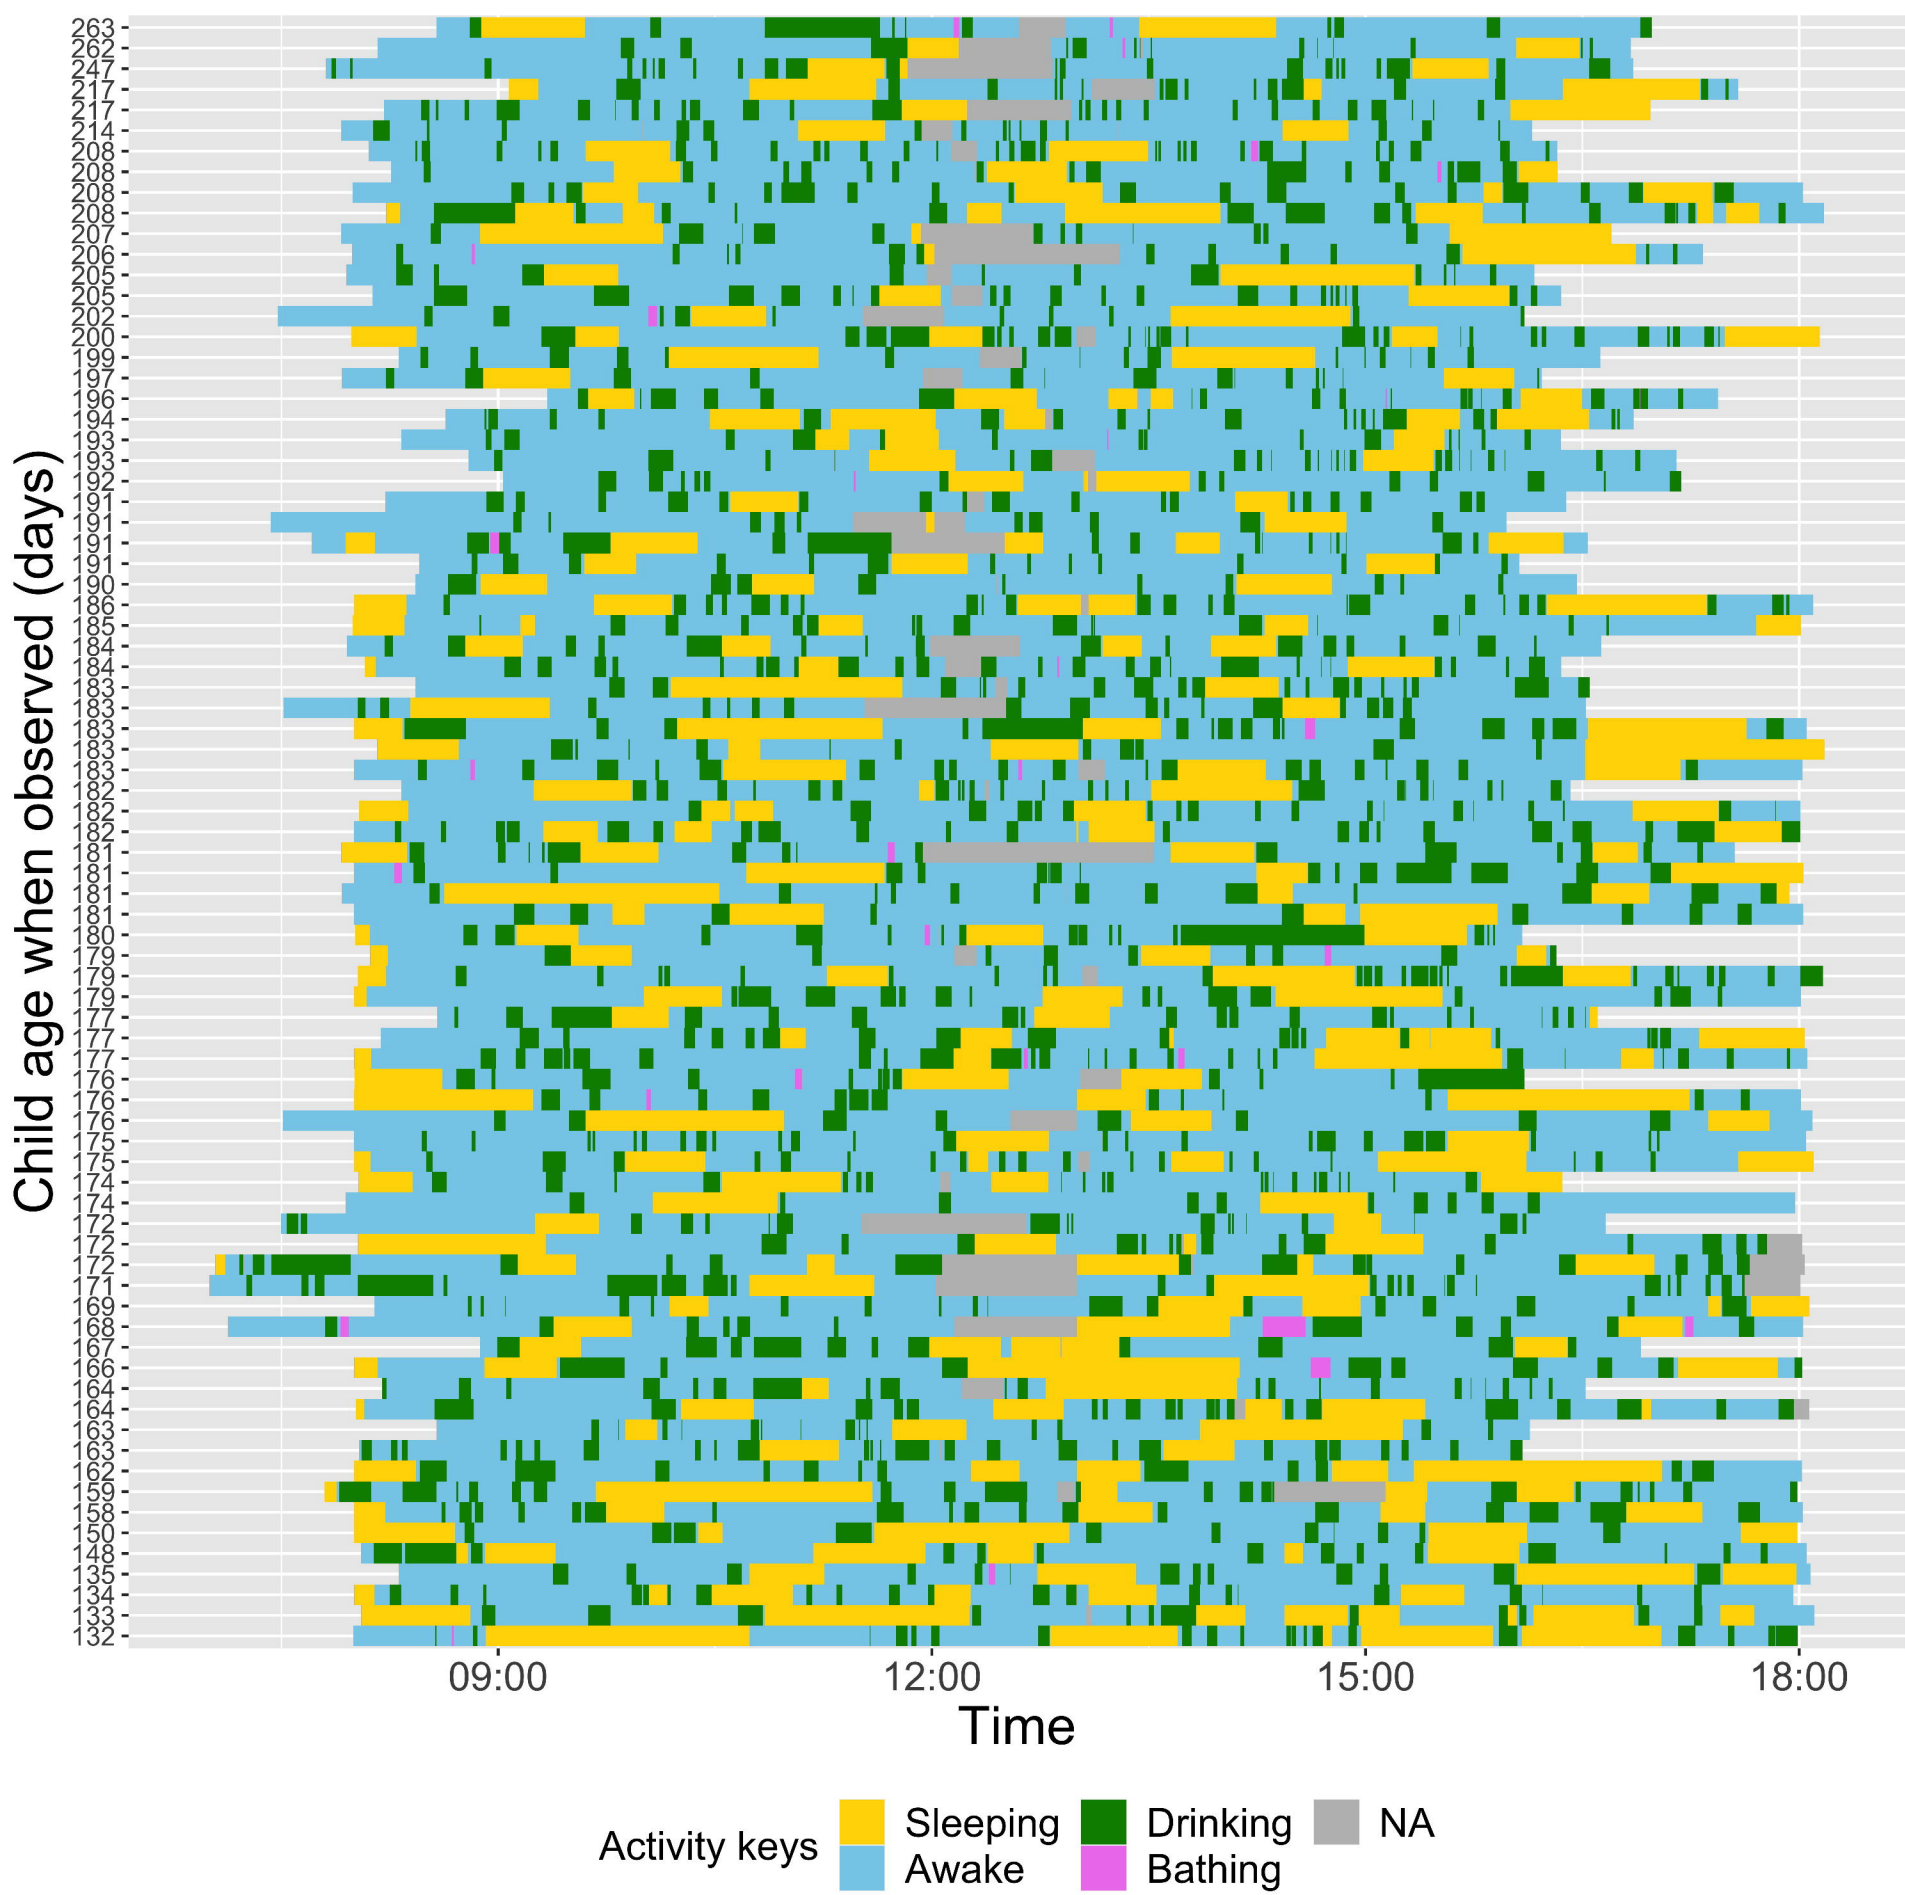

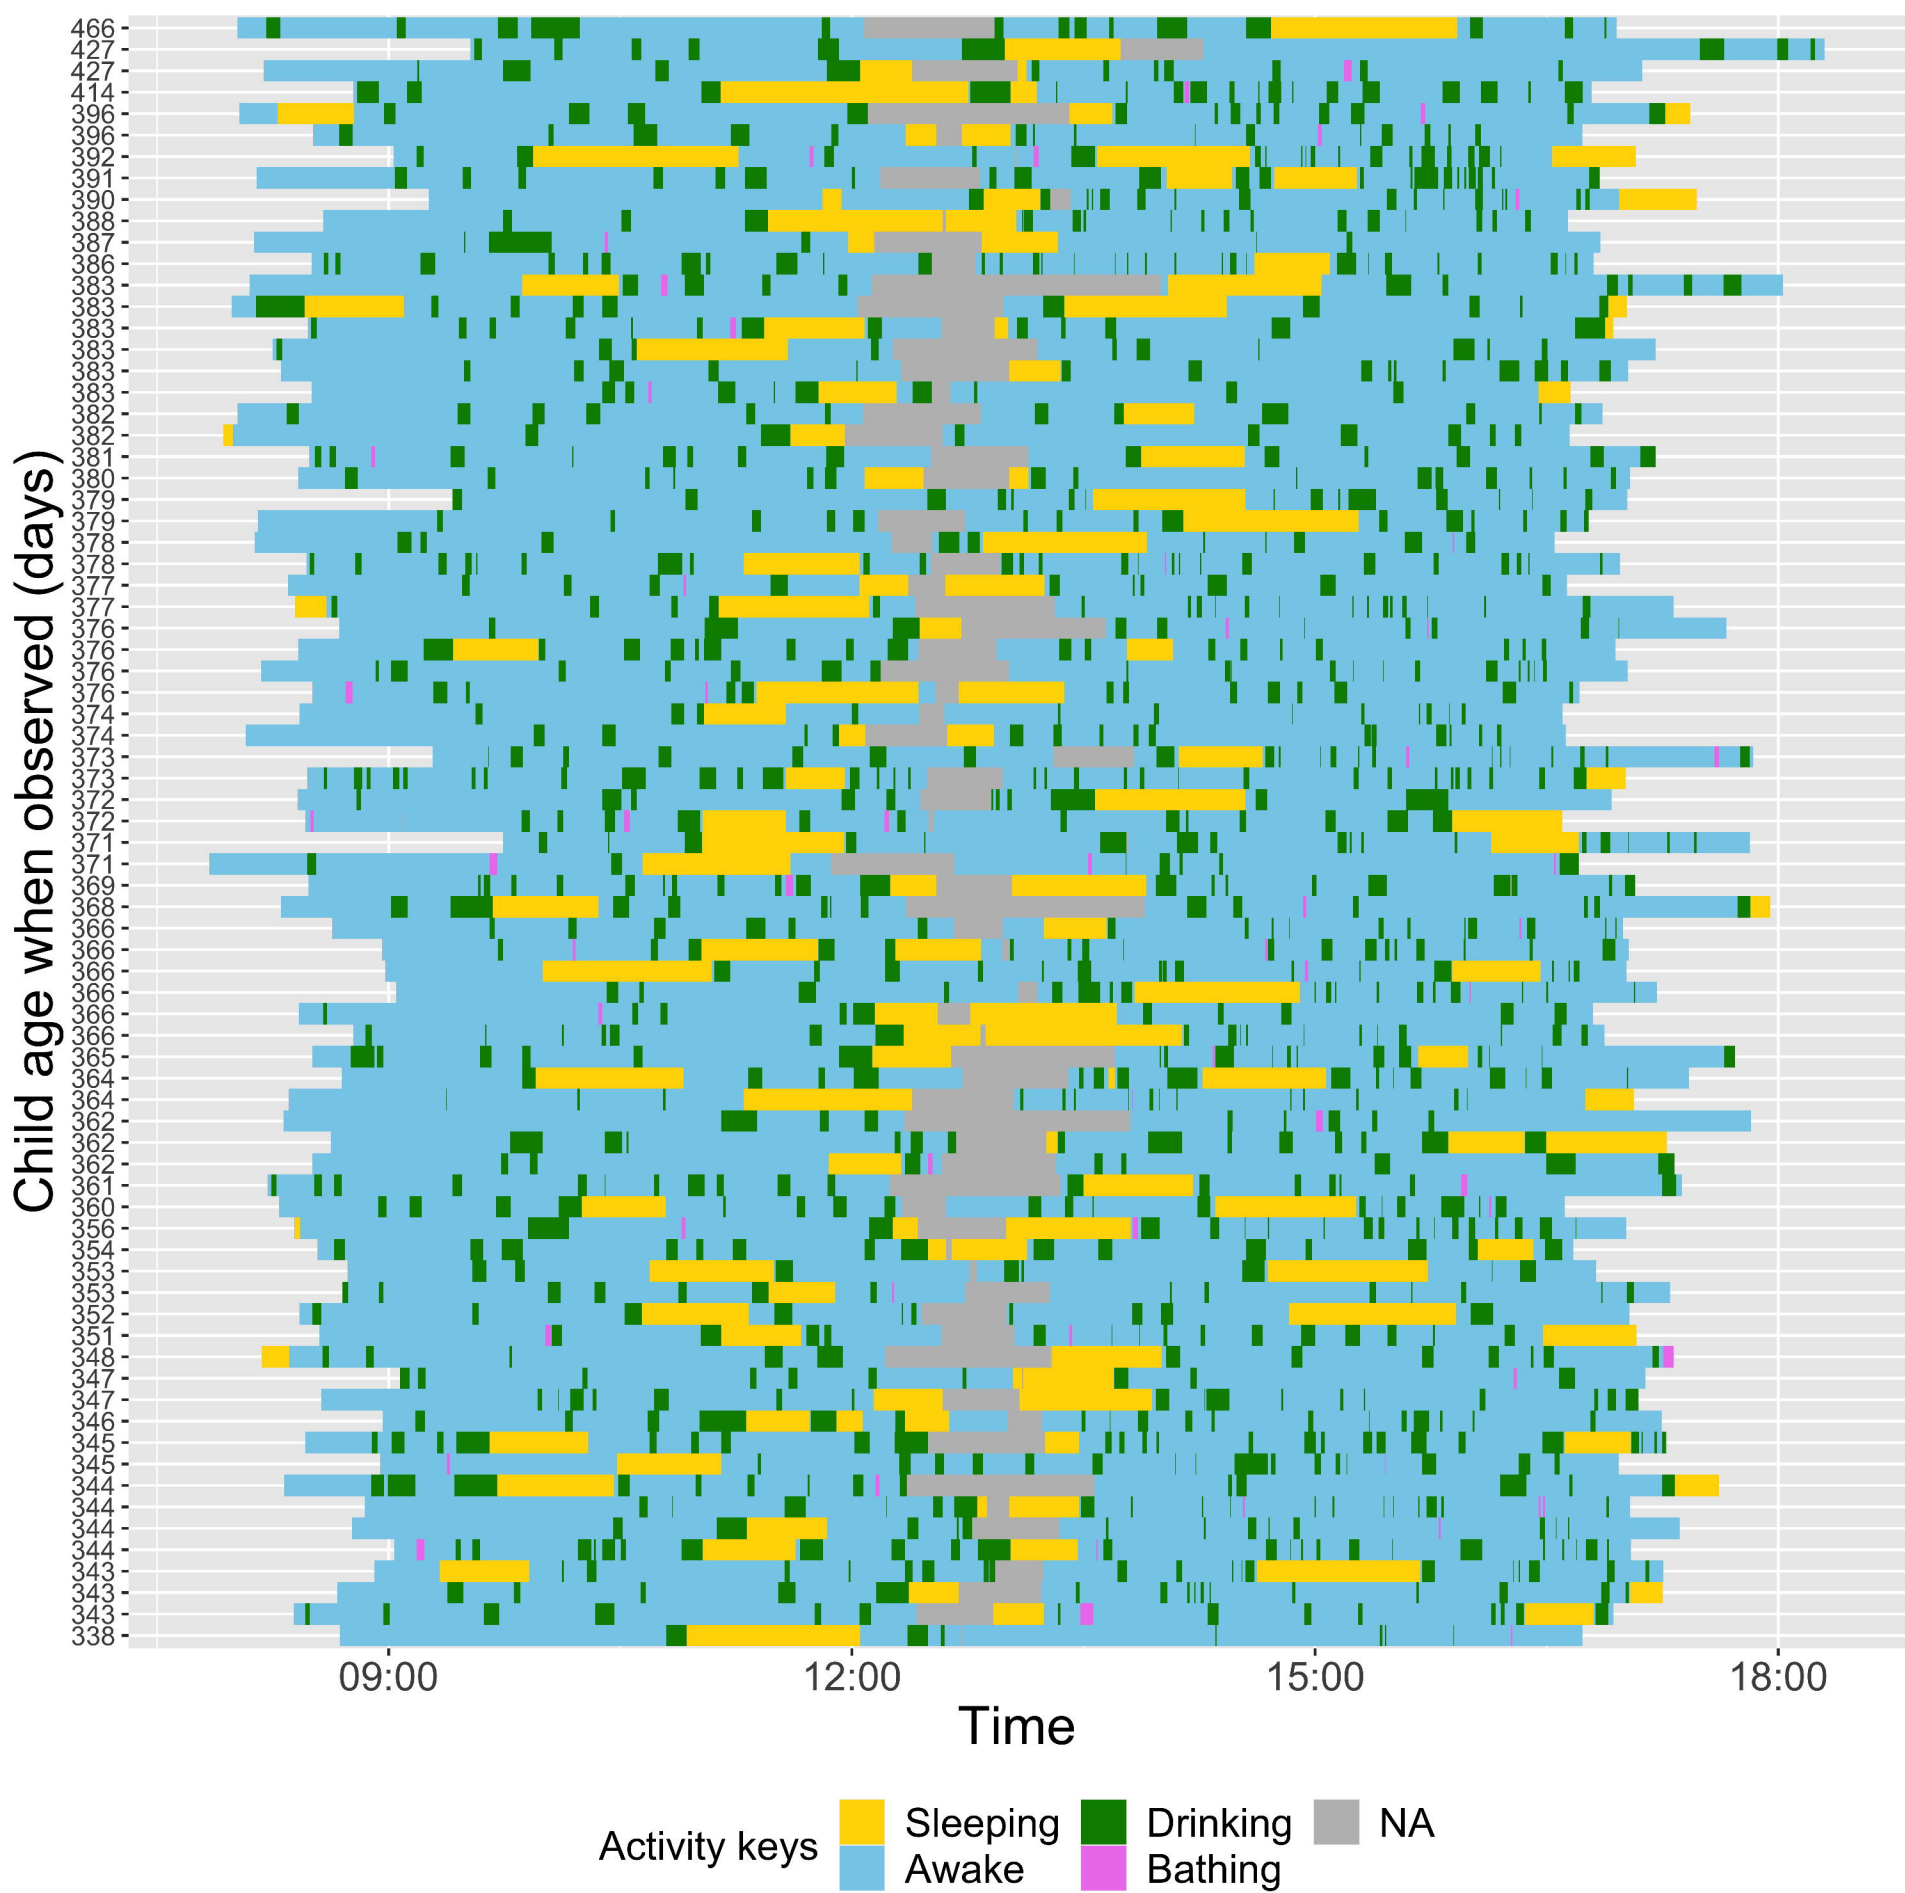

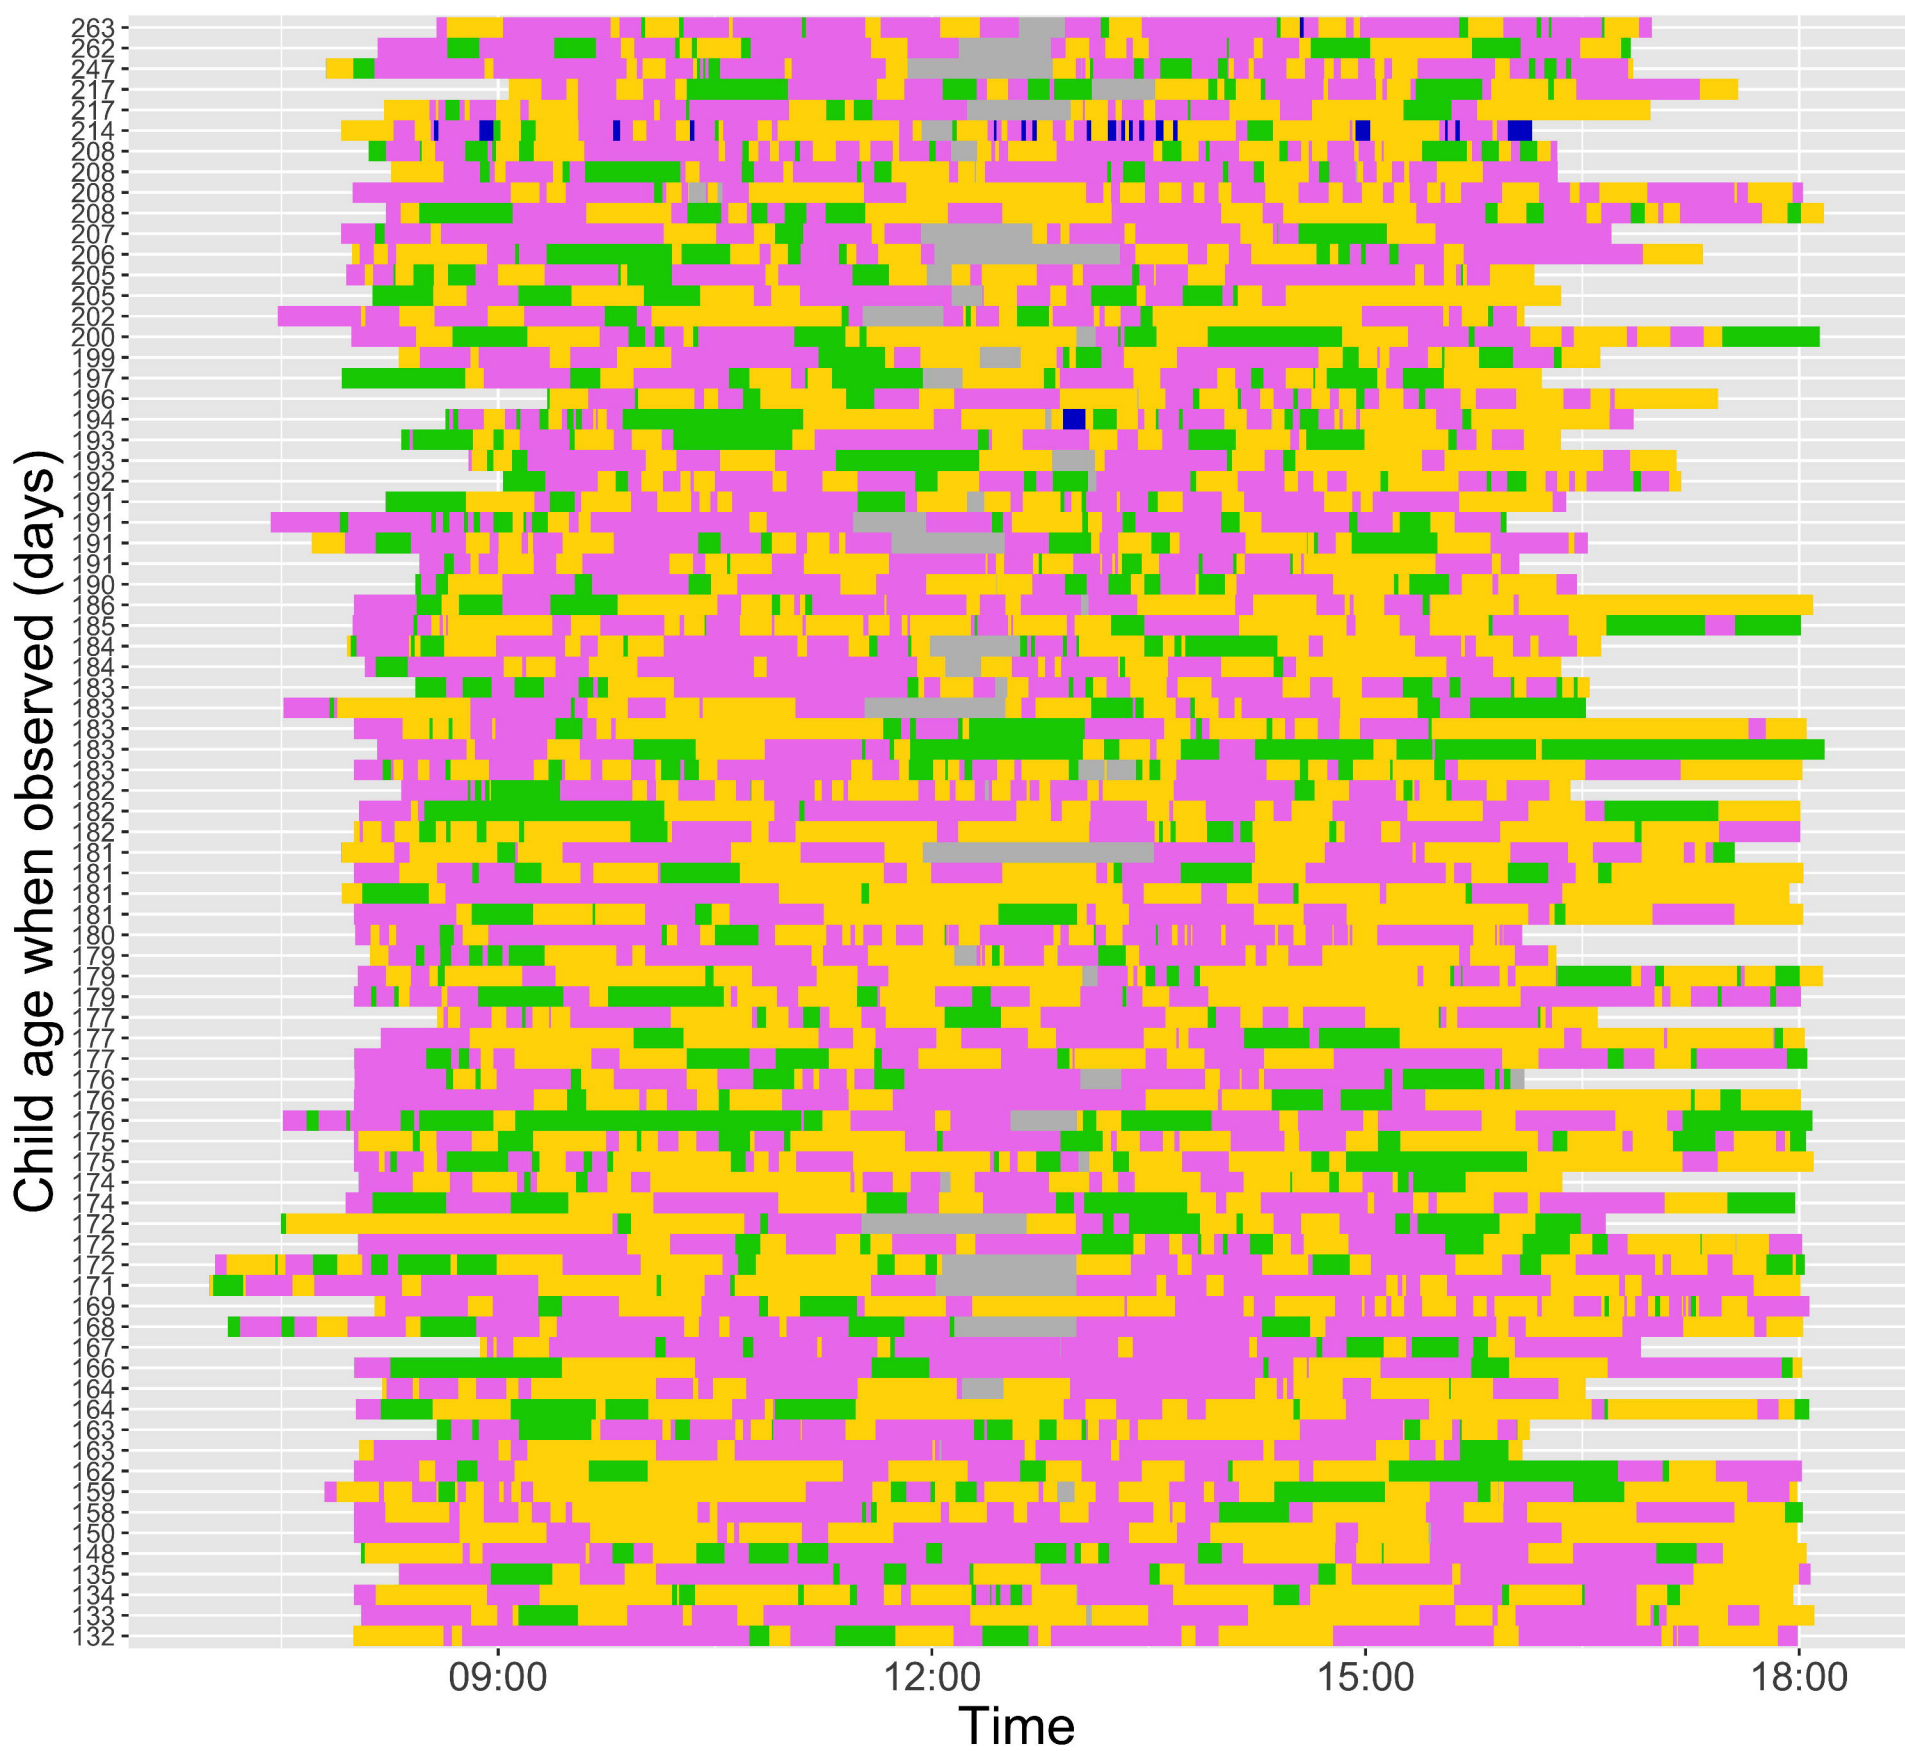

Compartment keys

Carried by mother  
Carried by other

On a surface with barriers  
On the bare ground

NA



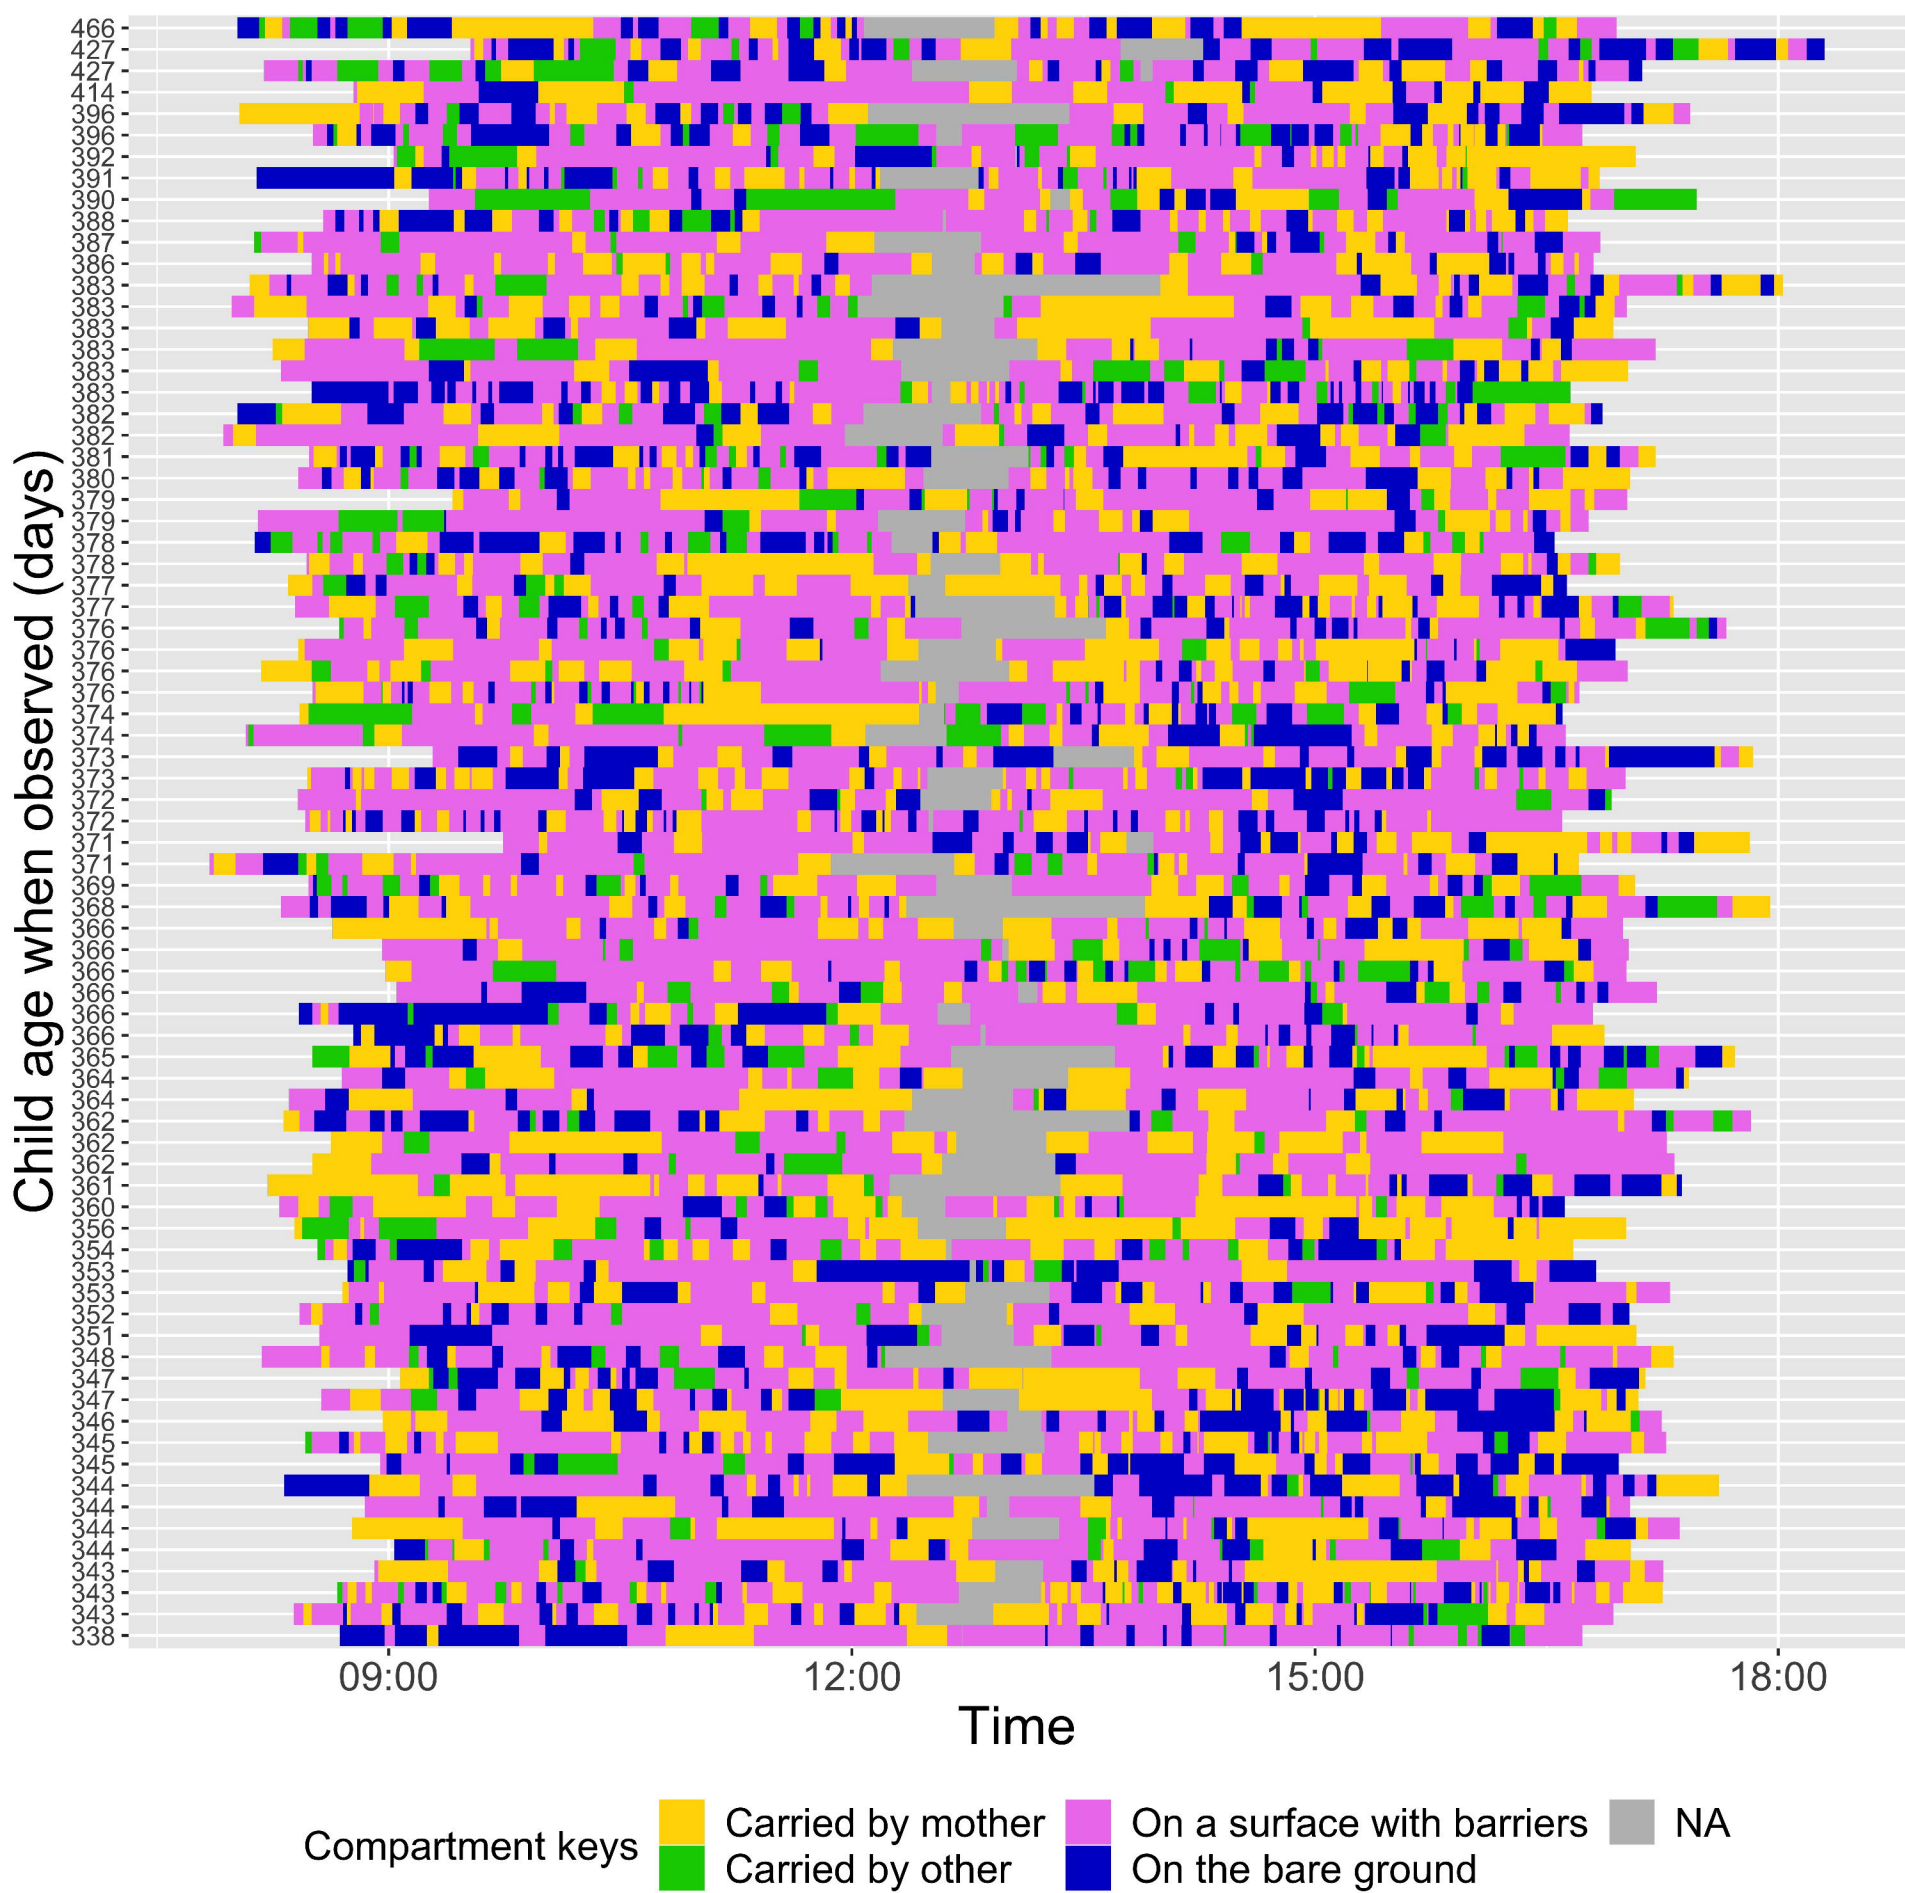

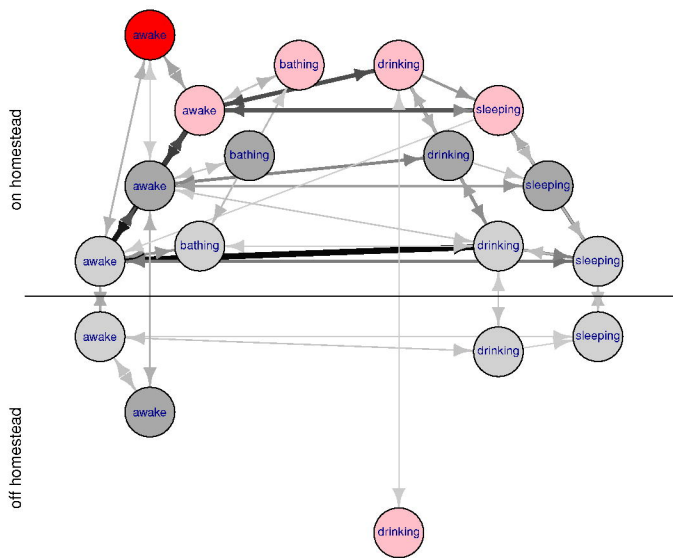

on homestead

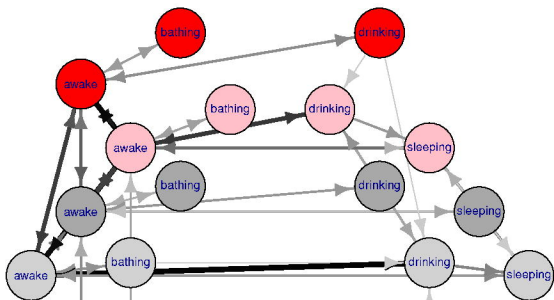

off homestead

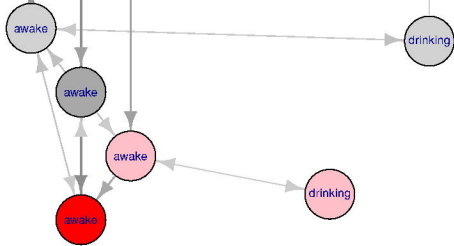

State

On a surface with barriers, Sleeping

On a surface with barriers, Drinking

On a surface with barriers, Bathing

On a surface with barriers, Awake

Carried by other, Sleeping

Carried by other, Drinking

Carried by other, Bathing

Carried by other, Awake

Carried by mother, Sleeping

Carried by mother, Drinking

Carried by mother, Bathing

Carried by mother, Awake

On the bare ground, Awake

Total

On a surface with barriers, Awake

On a surface with barriers, Bathing

On a surface with barriers, Drinking

medRxiv preprint doi: <https://doi.org/10.1101/2024.08.29.24312786>; this version posted August 30, 2024. The copyright holder for this preprint (which was not certified by peer review) is the author/funder, who has granted medRxiv a license to display the preprint in perpetuity. It is made available under a CC-BY-NC-ND 4.0 International license.

|      |      |      |       |      |      |       |       |      |      |       |       |       |      |       |
|------|------|------|-------|------|------|-------|-------|------|------|-------|-------|-------|------|-------|
| 0.17 | 0    | 0.18 | 8.84  | 0.59 | 0.28 | 0.21  | 3.21  | 0    | 0.04 | 8.8   | 3.99  | 3.38  | 0.02 | 3.88  |
| 0    | 0    | 0    | 15.88 | 0    | 0    | 0     | 15.05 | 0.84 | 5.85 | 15.05 | 0.84  | 7.52  | 0    | 19.22 |
| 0    | 0    | 0    | 0     | 0    | 0    | 0     | 0     | 0    | 0    | 0.11  | 0.05  | 0.01  | 0    | 0.03  |
| 0    | 0    | 0.18 | 3.29  | 0.09 | 0    | 0.04  | 3.82  | 0    | 0.09 | 8.17  | 1.01  | 1.67  | 0    | 3.12  |
| 0    | 0    | 0    | 5.55  | 0    | 0    | 0     | 0     | 0    | 0    | 22.19 | 0     | 0     | 0    | 0     |
| 0.05 | 0.01 | 0.22 | 16.22 | 0.43 | 0.32 | 0.49  | 8.61  | 0.01 | 0.08 | 7.96  | 5.2   | 7.08  | 0.05 | 10.08 |
| 0    | 0    | 0    | 0     | 0    | 0    | 0     | 0     | 0    | 0    | 0.07  | 0.07  | 0     | 0    | 0     |
| 0    | 0    | 0    | 7.22  | 0    | 0.23 | 1.17  | 1.86  | 0    | 0    | 2.56  | 12.35 | 9.09  | 0    | 3.5   |
| 0    | 0    | 0    | 70.13 | 0    | 0    | 46.75 | 0     | 0    | 0    | 0     | 0     | 46.75 | 0    | 0     |
| 0.21 | 0    | 0.13 | 11.19 | 0.11 | 1.5  | 0.27  | 1.7   | 0    | 0    | 1.63  | 17.79 | 5.17  | 0.01 | 2.44  |
| 0    | 0    | 0    | 0     | 0    | 0    | 0     | 0.13  | 0    | 0    | 0.2   | 0.04  | 0     | 0    | 0.02  |
| 0.03 | 0    | 0    | 0.59  | 0.03 | 0    | 0     | 0.19  | 0    | 0    | 13.28 | 0.25  | 0.72  | 0    | 0.41  |
| 0    | 0    | 0    | 1.44  | 0.96 | 0    | 0     | 0     | 0    | 0    | 16.76 | 0     | 0     | 0    | 0     |
| 0.62 | 0    | 0.46 | 13.2  | 2.15 | 0.05 | 0.14  | 2.08  | 0    | 0.03 | 20.56 | 1.27  | 2.79  | 0.03 | 2.81  |

|               |                    |              |                    |                         |                              |                              |                  |           |            |                         |                              |                              |                    |                  |
|---------------|--------------------|--------------|--------------------|-------------------------|------------------------------|------------------------------|------------------|-----------|------------|-------------------------|------------------------------|------------------------------|--------------------|------------------|
| Eating—injera | Eating—raw produce | Eating—other | Mouthing—own hands | Mouthing—mother's hands | Mouthing—other adult's hands | Mouthing—other child's hands | Mouthing—fomites | Pica—soil | Pica—other | Touching—mother's hands | Touching—other adult's hands | Touching—other child's hands | Touching—livestock | Touching—fomites |
|---------------|--------------------|--------------|--------------------|-------------------------|------------------------------|------------------------------|------------------|-----------|------------|-------------------------|------------------------------|------------------------------|--------------------|------------------|

Behavior

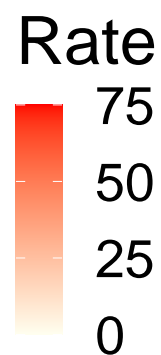



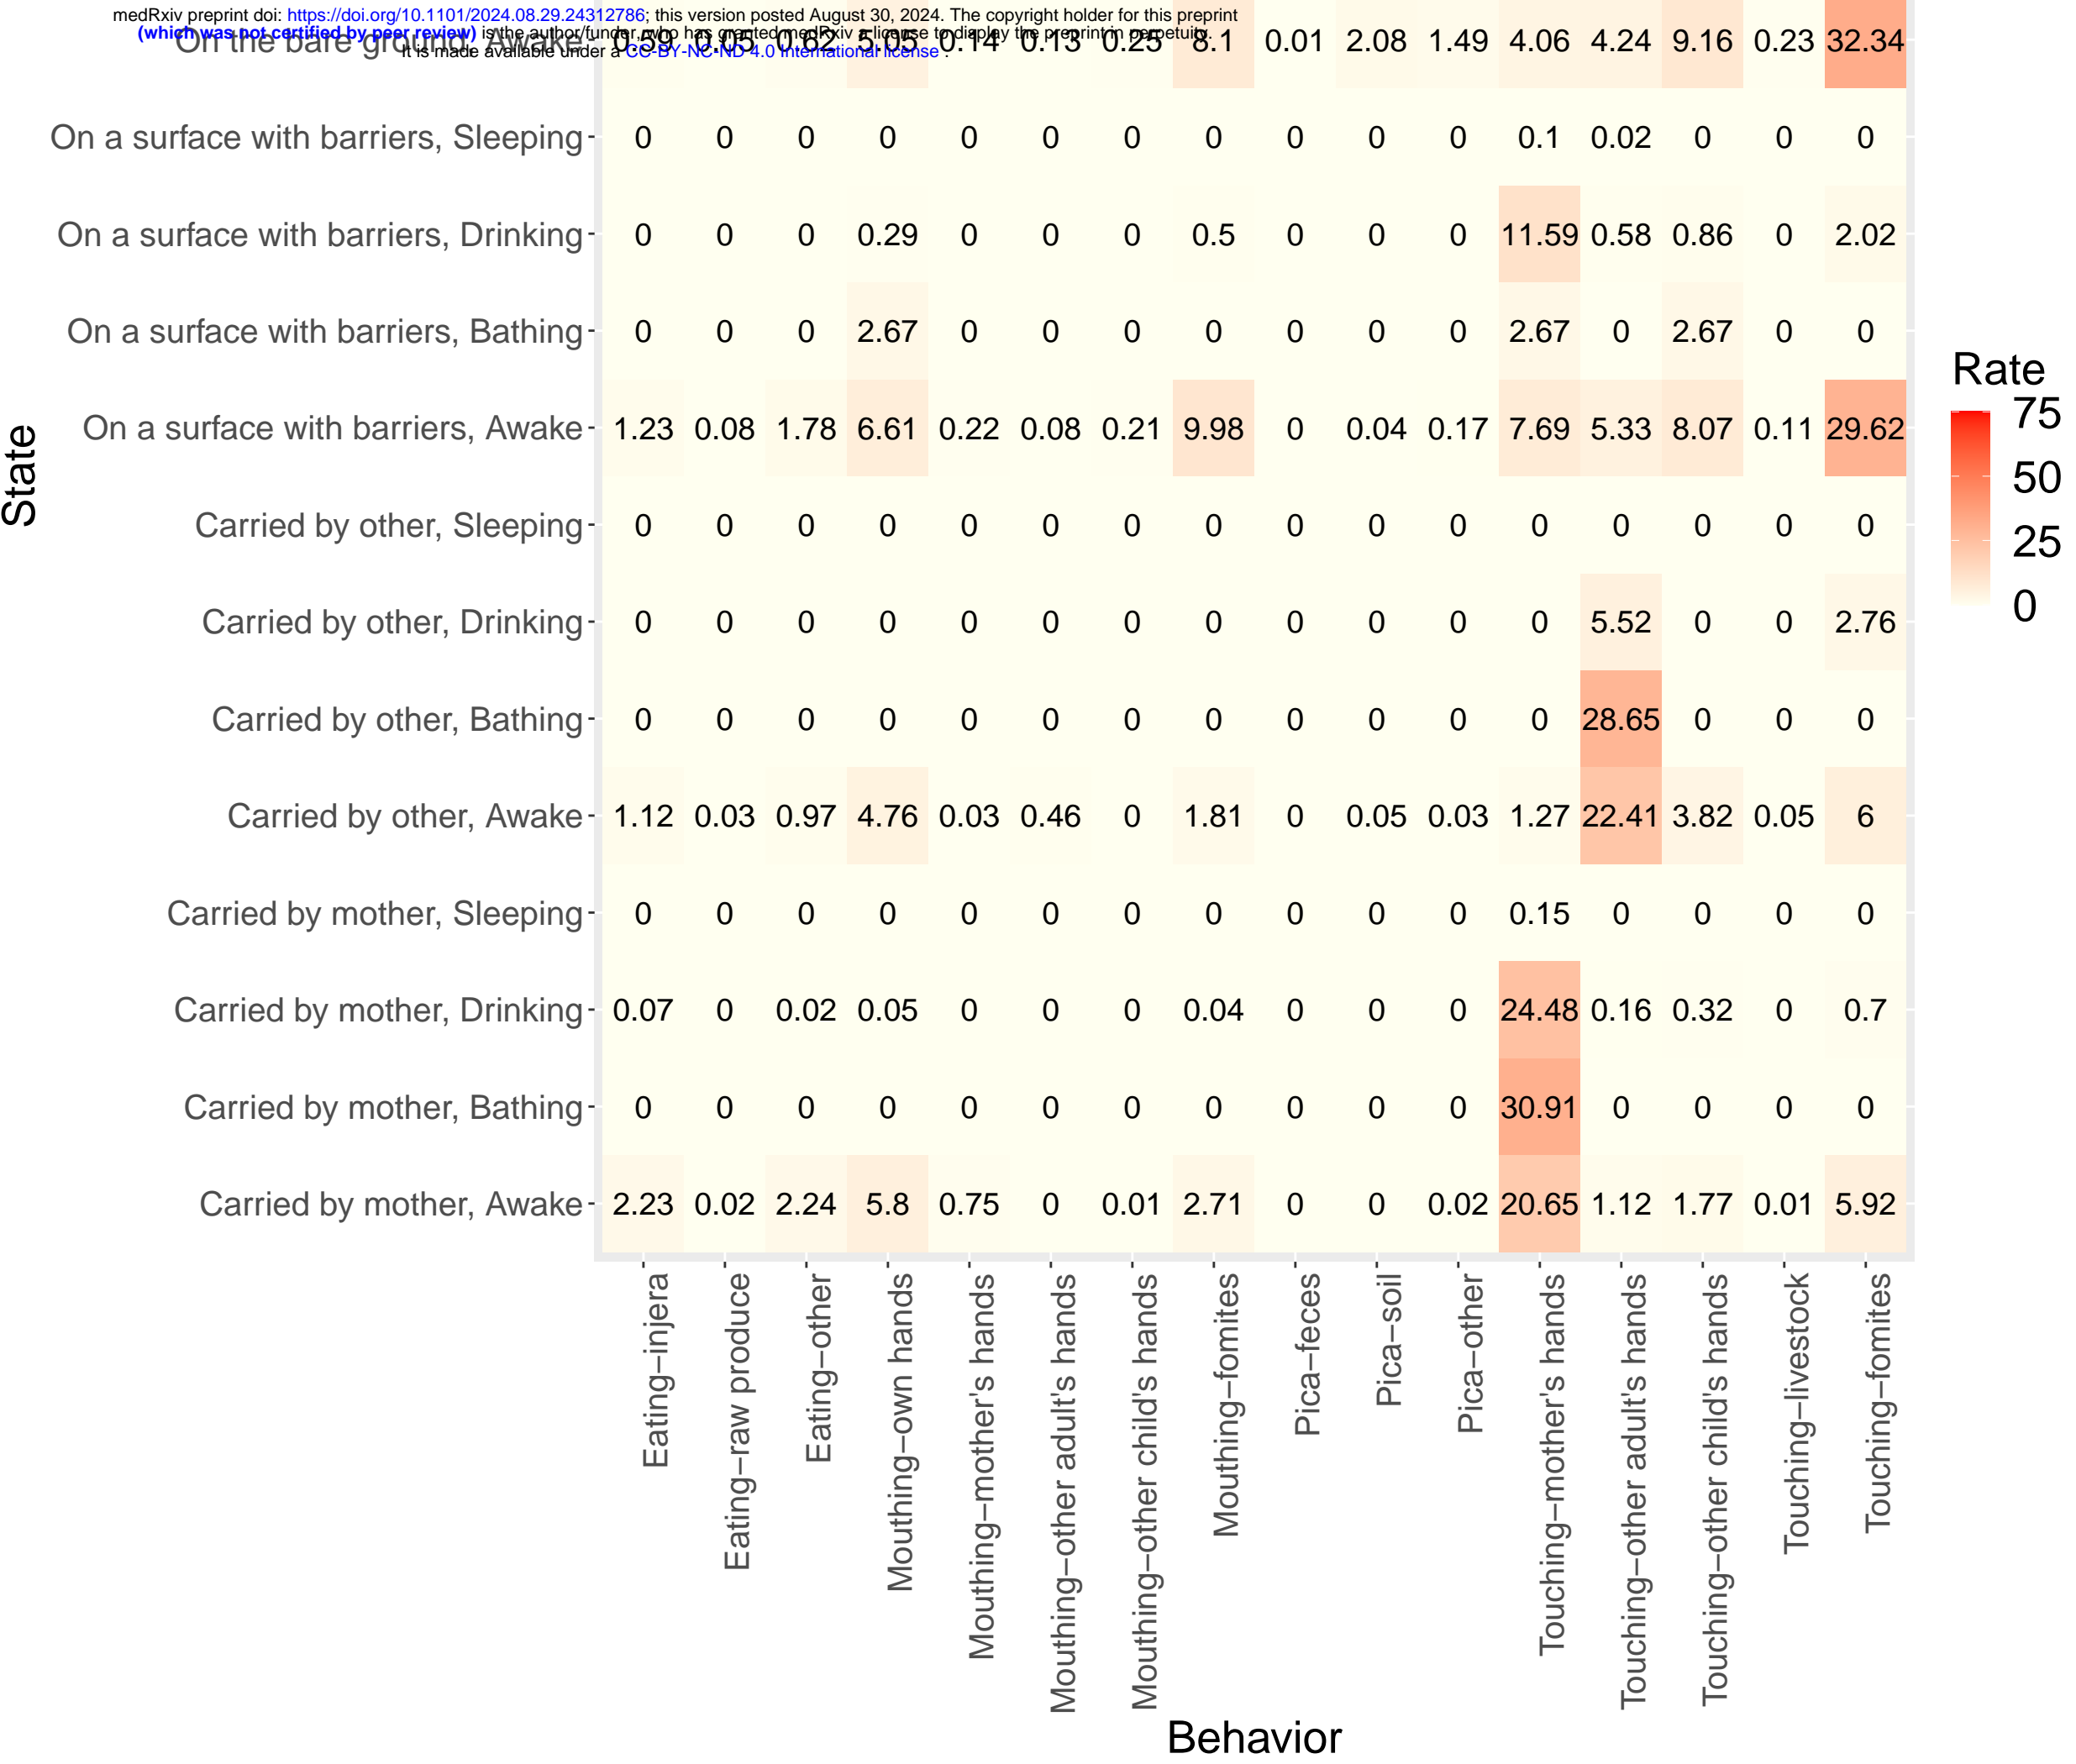

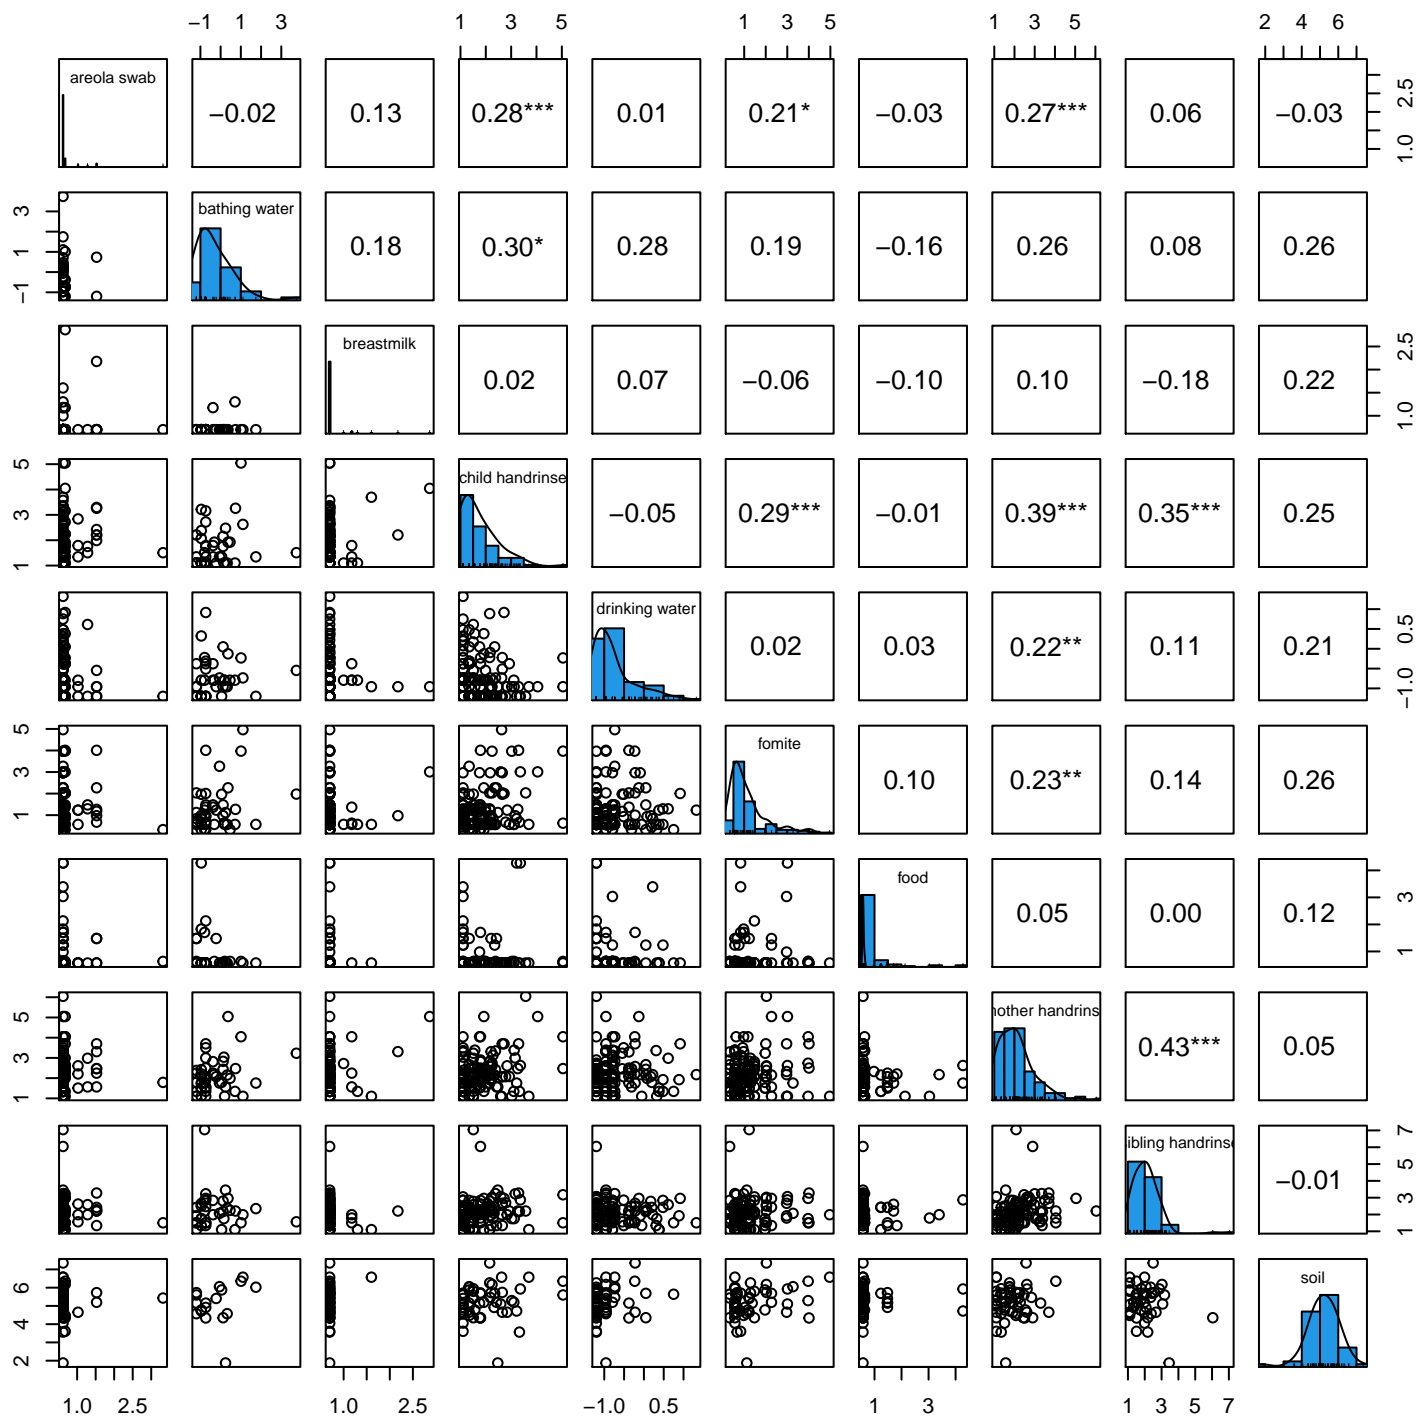

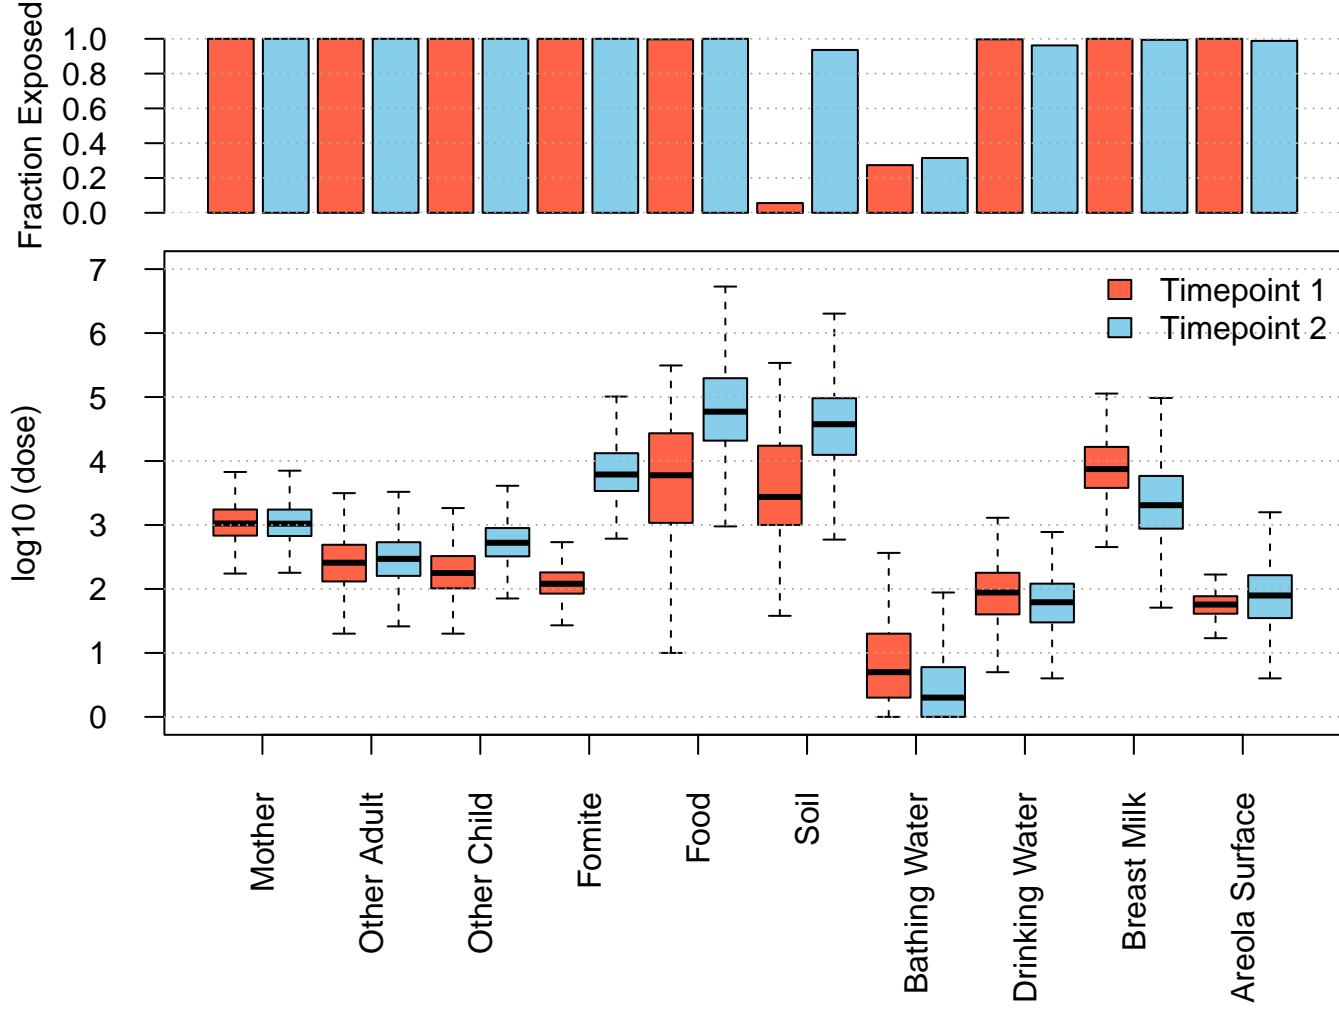

Source: http://medrxiv.stage.highwire.org/content/10.1101/2024.08.29.24312786v1.full.pdf
